# Supplementary material for: Integrative Annotation of 21,037 Human Genes Validated by Full-Length cDNA Clones
Source: PubMed Central journal article supplement (PMC393292; doi:10.1371/journal.pbio.0020162), 2004-04-20

**Table S5. GO Term Assignment to H-Inv Proteins**

**(A) Molecular function.**

| term                      | Human | Fly  | Worm | Budding yeast<br>Frequency (%) | Fission yeast | Plant | Bacteria |
|---------------------------|-------|------|------|--------------------------------|---------------|-------|----------|
| ligand binding or carrier | 41.2  | 35.8 | 32.1 | 39.0                           | 39.2          | 36.6  | 30.8     |
| enzyme                    | 34.8  | 39.6 | 34.3 | 41.0                           | 42.2          | 44.7  | 37.0     |
| transporter               | 7.9   | 10.3 | 9.3  | 9.2                            | 7.5           | 7.2   | 17.4     |
| signal transducer         | 6.5   | 5.1  | 13.0 | 0.8                            | 0.9           | 1.6   | 3.0      |
| transcription regulator   | 3.5   | 2.9  | 5.6  | 2.5                            | 1.9           | 2.6   | 6.1      |
| structural molecule       | 2.4   | 1.7  | 1.8  | 3.8                            | 4.6           | 1.9   | 1.6      |
| enzyme regulator          | 0.9   | 1.0  | 0.6  | 0.2                            | 0.3           | 0.8   | 0.0      |
| motor                     | 0.7   | 0.7  | 0.4  | 0.3                            | 0.4           | 0.5   | 0.4      |
| translation regulator     | 0.5   | 0.6  | 0.3  | 0.8                            | 0.9           | 0.5   | 0.6      |
| apoptosis regulator       | 0.4   | 0.1  | 0.0  | 0.0                            | 0.1           | 0.0   | 0.0      |
| cell adhesion molecule    | 0.2   | 0.1  | 0.0  | 0.0                            | 0.0           | 0.0   | 0.0      |
| chaperone                 | 0.2   | 0.2  | 0.1  | 0.3                            | 0.3           | 0.2   | 0.5      |
| other terms               | 1.1   | 1.8  | 2.4  | 2.0                            | 1.8           | 3.4   | 2.7      |

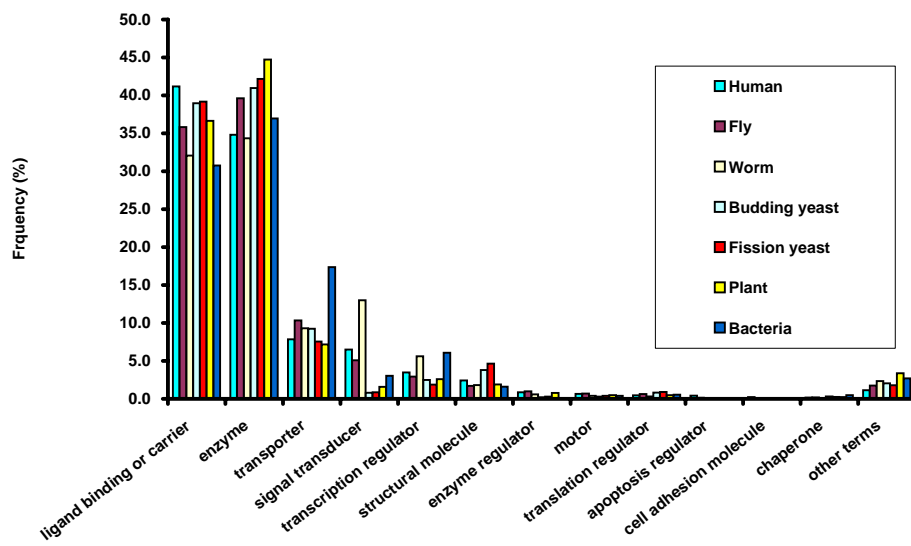

**Table S5. GO Term Assignment to H-Inv Proteins**

**(B) Cellular component.**

| term                      | Human | Fly  | Worm | Budding yeast<br>Frequency (%) | Fission yeast | Plant | Bacteria |
|---------------------------|-------|------|------|--------------------------------|---------------|-------|----------|
| <b>INTRACELLULAR*</b>     |       |      |      |                                |               |       |          |
| nucleus                   | 29.9  | 24.9 | 21.7 | 21.7                           | 19.6          | 28.3  | 0.6      |
| intracellular             | 14.7  | 8.3  | 6.1  | 13.1                           | 16.2          | 11.1  | 15.7     |
| cytoplasm                 | 13.8  | 15.3 | 9.4  | 20.8                           | 22.5          | 16.3  | 10.5     |
| ribonucleoprotein complex | 4.2   | 4.3  | 2.6  | 10.8                           | 12.6          | 7.2   | 4.1      |
| other terms               | 2.0   | 1.4  | 2.4  | 1.4                            | 1.9           | 2.4   | 3.8      |
| <b>MEMBRANE*</b>          |       |      |      |                                |               |       |          |
| membrane                  | 17.9  | 25.4 | 36.0 | 17.9                           | 14.6          | 22.9  | 41.5     |
| integral membrane protein | 5.5   | 6.1  | 13.2 | 3.9                            | 2.6           | 3.1   | 9.1      |
| plasma membrane           | 2.5   | 1.9  | 1.8  | 0.5                            | 0.5           | 0.4   | 0.6      |
| mitochondrial membrane    | 1.9   | 2.6  | 1.3  | 3.2                            | 2.8           | 2.1   | 1.8      |
| other terms               | 2.6   | 3.4  | 1.6  | 3.9                            | 3.5           | 2.6   | 2.4      |
| <b>EXTRACELLULAR*</b>     |       |      |      |                                |               |       |          |
| extracellular             | 2.9   | 3.3  | 1.5  | 0.2                            | 0.1           | 0.4   | 0.1      |
| extracellular matrix      | 0.6   | 0.4  | 0.3  | 0.0                            | 0.1           | 0.1   | 0.0      |
| extracellular space       | 0.0   | 0.0  | 0.0  | 0.0                            | 0.0           | 0.0   | 0.0      |
| <b>OTHER COMPONENTS*</b>  | 1.5   | 2.6  | 2.2  | 2.8                            | 3.0           | 3.0   | 9.7      |

Asterisk indicates term of parental GO ID.

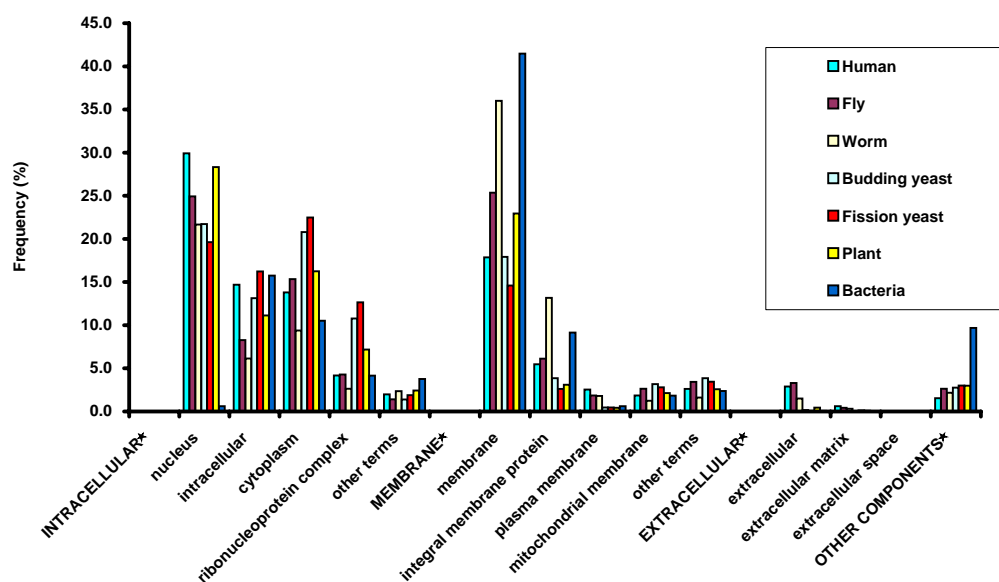

**Table S5. GO Term Assignment to H-Inv Proteins**

**(C) Biological process.**

| term                                   | Human | Fly  | Worm | Budding yeast | Fission yeast | Plant | Bacteria |
|----------------------------------------|-------|------|------|---------------|---------------|-------|----------|
| <b>CELL COMMUNICATION*</b>             |       |      |      |               |               |       |          |
| signal transduction                    | 11.1  | 8.1  | 11.1 | 2.9           | 3.1           | 2.6   | 3.2      |
| other terms                            | 3.4   | 2.3  | 1.9  | 0.6           | 0.4           | 2.5   | 1.4      |
| <b>CELL GROWTH AND/OR MAINTENANCE*</b> |       |      |      |               |               |       |          |
| protein metabolism and modification    | 18.0  | 20.3 | 17.7 | 19.6          | 21.4          | 19.7  | 8.6      |
| DNA and/or RNA metabolism              | 15.6  | 10.1 | 13.1 | 14.7          | 14.1          | 13.3  | 18.1     |
| transport                              | 12.9  | 15.6 | 14.9 | 13.1          | 10.8          | 10.1  | 17.5     |
| biosynthesis                           | 6.7   | 6.6  | 5.1  | 14.2          | 15.5          | 9.0   | 11.7     |
| catabolism                             | 6.3   | 8.8  | 5.4  | 4.8           | 4.9           | 5.3   | 4.1      |
| phosphate metabolism                   | 5.5   | 5.9  | 8.5  | 4.5           | 4.8           | 9.0   | 1.3      |
| metabolism                             | 3.6   | 4.9  | 4.8  | 5.0           | 5.0           | 4.9   | 6.2      |
| cell organization and biogenesis       | 2.5   | 1.4  | 2.8  | 1.4           | 1.6           | 1.8   | 1.1      |
| electron transport                     | 2.5   | 3.4  | 2.9  | 3.1           | 2.8           | 4.8   | 6.0      |
| other terms                            | 9.4   | 11.1 | 10.6 | 16.0          | 15.0          | 15.2  | 20.5     |
| <b>DEVELOPMENTAL PROCESSES*</b>        | 1.3   | 1.0  | 0.8  | 0.1           | 0.1           | 0.2   | 0.2      |
| <b>PHYSIOLOGICAL PROCESSES*</b>        | 0.2   | 0.0  | 0.2  | 0.0           | 0.0           | 0.1   | 0.1      |
| <b>OTHER BIOLOGICAL PROCESSES*</b>     | 0.7   | 0.3  | 0.1  | 0.1           | 0.3           | 1.4   | 0.1      |

Asterisk indicates term of parental GO ID.

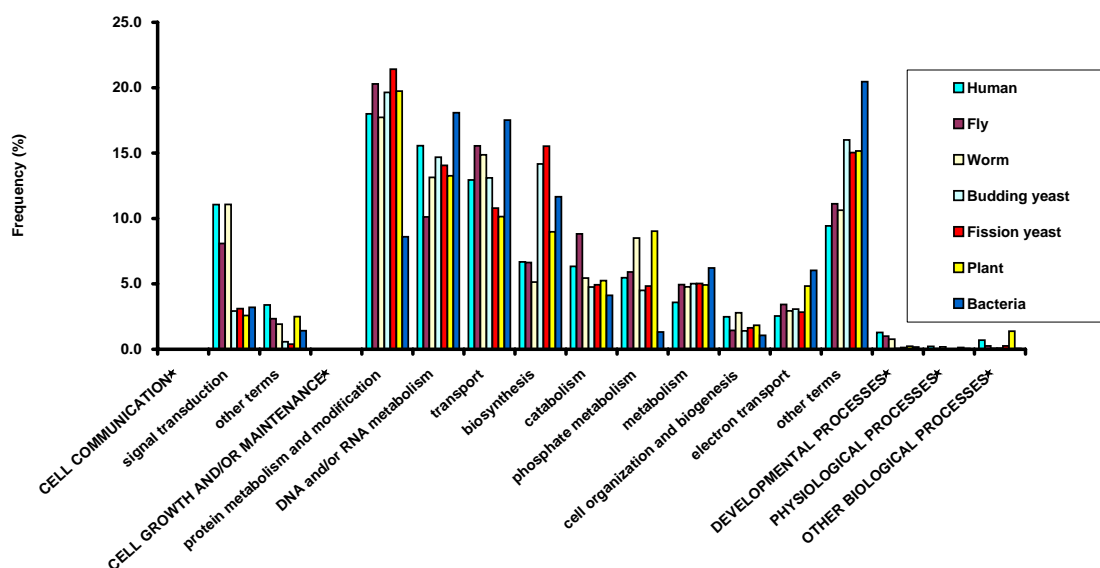

Supplement: pbio.0020162.st005.pdf [file pbio.0020162.st005.pdf]
