# Supplementary material for: Integrative Annotation of 21,037 Human Genes Validated by Full-Length cDNA Clones
Source: PLoS Biol. 2004 Apr 20;2(6):e162. doi: 10.1371/journal.pbio.0020162 (PMC393292; doi:10.1371/journal.pbio.0020162)
Supplement: Figure S3 — The size distribution of all H-Inv proteins among the five similarity categories. (24 KB PDF). [file pbio.0020162.sg003.pdf]

**Figure S3. Size Distribution of Predicted ORFs**

The size distribution of all H-Inv proteins among the five similarity categories.

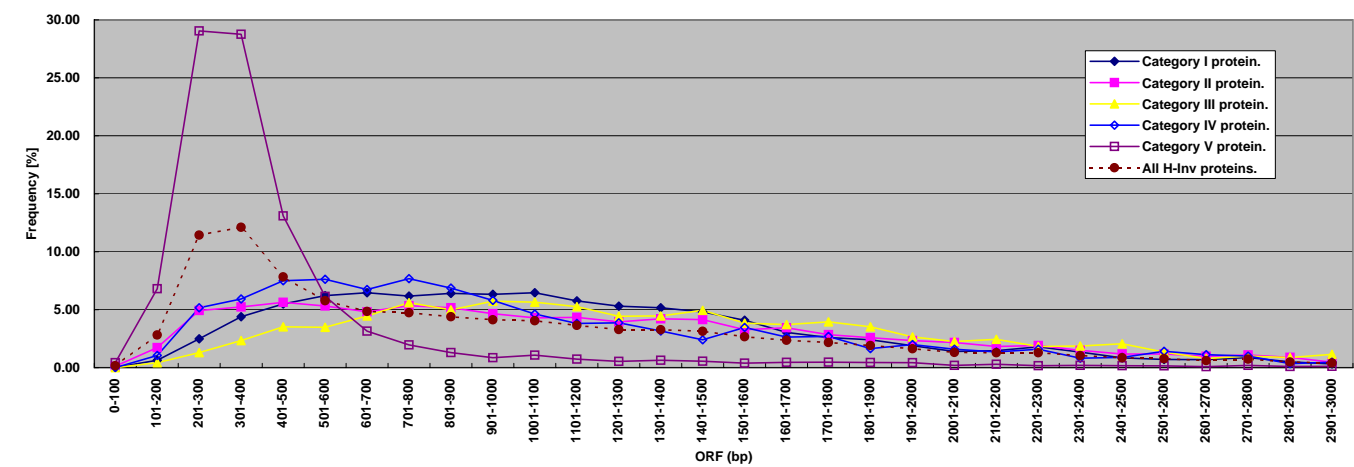

**Size distribution of ORFs**

| No. of predicted ORFs |                    |                     |                      |                     |                    |                   |
|-----------------------|--------------------|---------------------|----------------------|---------------------|--------------------|-------------------|
| Size of ORF (bp)      | Category I protein | Category II protein | Category III protein | Category IV protein | Category V protein | All H-Inv protein |
| 0-100                 | 1                  | 5                   | 0                    | 0                   | 26                 | 32                |
| 101-200               | 32                 | 71                  | 11                   | 18                  | 419                | 551               |
| 201-300               | 126                | 202                 | 33                   | 88                  | 1789               | 2238              |
| 301-400               | 223                | 215                 | 59                   | 101                 | 1771               | 2369              |
| 401-500               | 279                | 231                 | 89                   | 128                 | 806                | 1533              |
| 501-600               | 315                | 218                 | 88                   | 130                 | 378                | 1129              |
| 601-700               | 328                | 198                 | 113                  | 115                 | 194                | 948               |
| 701-800               | 313                | 219                 | 142                  | 131                 | 121                | 926               |
| 801-900               | 325                | 212                 | 126                  | 117                 | 80                 | 860               |
| 901-1000              | 321                | 191                 | 145                  | 99                  | 53                 | 809               |
| 1001-1100             | 328                | 176                 | 143                  | 79                  | 66                 | 792               |
| 1101-1200             | 292                | 178                 | 133                  | 65                  | 45                 | 713               |
| 1201-1300             | 269                | 162                 | 112                  | 66                  | 33                 | 642               |
| 1301-1400             | 262                | 173                 | 113                  | 54                  | 39                 | 641               |
| 1401-1500             | 244                | 170                 | 125                  | 41                  | 34                 | 614               |
| 1501-1600             | 207                | 134                 | 97                   | 59                  | 24                 | 521               |
| 1601-1700             | 154                | 141                 | 94                   | 45                  | 28                 | 462               |
| 1701-1800             | 132                | 117                 | 100                  | 46                  | 29                 | 424               |
| 1801-1900             | 122                | 106                 | 89                   | 28                  | 27                 | 372               |
| 1901-2000             | 96                 | 96                  | 67                   | 34                  | 26                 | 319               |
| 2001-2100             | 71                 | 89                  | 57                   | 27                  | 12                 | 256               |
| 2101-2200             | 74                 | 75                  | 62                   | 23                  | 18                 | 252               |
| 2201-2300             | 91                 | 78                  | 46                   | 27                  | 10                 | 252               |
| 2301-2400             | 68                 | 61                  | 47                   | 14                  | 12                 | 202               |
| 2401-2500             | 43                 | 48                  | 52                   | 15                  | 10                 | 168               |
| 2501-2600             | 36                 | 48                  | 34                   | 24                  | 9                  | 151               |
| 2601-2700             | 35                 | 40                  | 20                   | 19                  | 5                  | 119               |
| 2701-2800             | 44                 | 45                  | 25                   | 17                  | 12                 | 143               |
| 2801-2900             | 25                 | 36                  | 22                   | 6                   | 6                  | 95                |
| 2901-3000             | 16                 | 19                  | 29                   | 8                   | 7                  | 79                |
| 3001-3100             | 17                 | 32                  | 23                   | 10                  | 7                  | 89                |
| 3101-3200             | 22                 | 36                  | 16                   | 6                   | 4                  | 84                |
| 3201-3300             | 21                 | 20                  | 20                   | 7                   | 5                  | 73                |
| 3301-3400             | 17                 | 32                  | 17                   | 2                   | 4                  | 72                |
| 3401-3500             | 12                 | 24                  | 12                   | 4                   | 5                  | 57                |
| 3501-3600             | 12                 | 13                  | 18                   | 0                   | 6                  | 49                |

| % distribution of predicted ORFs |                    |                     |                      |                     |                    |                   |
|----------------------------------|--------------------|---------------------|----------------------|---------------------|--------------------|-------------------|
| Size of ORF (bp)                 | Category I protein | Category II protein | Category III protein | Category IV protein | Category V protein | All H-Inv protein |
| 0-100                            | 0.02               | 0.12                | 0.00                 | 0.00                | 0.42               | 0.16              |
| 101-200                          | 0.63               | 1.73                | 0.43                 | 1.06                | 6.80               | 2.81              |
| 201-300                          | 2.48               | 4.92                | 1.30                 | 5.16                | 29.05              | 11.43             |
| 301-400                          | 4.39               | 5.24                | 2.33                 | 5.92                | 28.75              | 12.10             |
| 401-500                          | 5.50               | 5.63                | 3.52                 | 7.50                | 13.09              | 7.83              |
| 501-600                          | 6.21               | 5.31                | 3.48                 | 7.62                | 6.14               | 5.77              |
| 601-700                          | 6.46               | 4.82                | 4.46                 | 6.74                | 3.15               | 4.84              |
| 701-800                          | 6.17               | 5.34                | 5.61                 | 7.68                | 1.96               | 4.73              |
| 801-900                          | 6.41               | 5.17                | 4.98                 | 6.86                | 1.30               | 4.39              |
| 901-1000                         | 6.33               | 4.65                | 5.73                 | 5.80                | 0.86               | 4.13              |
| 1001-1100                        | 6.46               | 4.29                | 5.65                 | 4.63                | 1.07               | 4.05              |
| 1101-1200                        | 5.75               | 4.34                | 5.25                 | 3.81                | 0.73               | 3.64              |
| 1201-1300                        | 5.30               | 3.95                | 4.43                 | 3.87                | 0.54               | 3.28              |
| 1301-1400                        | 5.16               | 4.22                | 4.46                 | 3.17                | 0.63               | 3.27              |
| 1401-1500                        | 4.81               | 4.14                | 4.94                 | 2.40                | 0.55               | 3.14              |
| 1501-1600                        | 4.08               | 3.27                | 3.83                 | 3.46                | 0.39               | 2.66              |
| 1601-1700                        | 3.04               | 3.44                | 3.71                 | 2.64                | 0.45               | 2.36              |
| 1701-1800                        | 2.60               | 2.85                | 3.95                 | 2.70                | 0.47               | 2.17              |
| 1801-1900                        | 2.40               | 2.58                | 3.52                 | 1.64                | 0.44               | 1.90              |
| 1901-2000                        | 1.89               | 2.34                | 2.65                 | 1.99                | 0.42               | 1.63              |
| 2001-2100                        | 1.40               | 2.17                | 2.25                 | 1.58                | 0.19               | 1.31              |
| 2101-2200                        | 1.46               | 1.83                | 2.45                 | 1.35                | 0.29               | 1.29              |
| 2201-2300                        | 1.79               | 1.90                | 1.82                 | 1.58                | 0.16               | 1.29              |
| 2301-2400                        | 1.34               | 1.49                | 1.86                 | 0.82                | 0.19               | 1.03              |
| 2401-2500                        | 0.85               | 1.17                | 2.05                 | 0.88                | 0.16               | 0.86              |
| 2501-2600                        | 0.71               | 1.17                | 1.34                 | 1.41                | 0.15               | 0.77              |
| 2601-2700                        | 0.69               | 0.97                | 0.79                 | 1.11                | 0.08               | 0.61              |
| 2701-2800                        | 0.87               | 1.10                | 0.99                 | 1.00                | 0.19               | 0.73              |
| 2801-2900                        | 0.49               | 0.88                | 0.87                 | 0.35                | 0.10               | 0.49              |
| 2901-3000                        | 0.32               | 0.46                | 1.15                 | 0.47                | 0.11               | 0.40              |
| 3001-3100                        | 0.34               | 0.78                | 0.91                 | 0.59                | 0.11               | 0.45              |
| 3101-3200                        | 0.43               | 0.88                | 0.63                 | 0.35                | 0.06               | 0.43              |
| 3201-3300                        | 0.41               | 0.49                | 0.79                 | 0.41                | 0.08               | 0.37              |
| 3301-3400                        | 0.34               | 0.78                | 0.67                 | 0.12                | 0.06               | 0.37              |
| 3401-3500                        | 0.24               | 0.58                | 0.47                 | 0.23                | 0.08               | 0.29              |
| 3501-3600                        | 0.24               | 0.32                | 0.71                 | 0.00                | 0.10               | 0.25              |

|             |      |      |      |      |      |       |
|-------------|------|------|------|------|------|-------|
| 3601-3700   | 16   | 16   | 15   | 4    | 5    | 56    |
| 3701-3800   | 10   | 8    | 10   | 4    | 1    | 33    |
| 3801-3900   | 10   | 15   | 10   | 5    | 4    | 44    |
| 3901-4000   | 6    | 15   | 15   | 4    | 1    | 41    |
| 4001-4100   | 2    | 10   | 10   | 5    | 2    | 29    |
| 4101-4200   | 7    | 18   | 4    | 3    | 3    | 35    |
| 4201-4300   | 3    | 6    | 5    | 3    | 2    | 19    |
| 4301-4400   | 4    | 10   | 12   | 2    | 3    | 31    |
| 4401-4500   | 4    | 9    | 8    | 2    | 2    | 25    |
| 4501-4600   | 4    | 7    | 10   | 1    | 2    | 24    |
| 4601-4700   | 2    | 1    | 10   | 3    | 0    | 16    |
| 4701-4800   | 2    | 4    | 9    | 2    | 1    | 18    |
| 4801-4900   | 2    | 10   | 0    | 2    | 0    | 14    |
| 4901-5000   | 2    | 7    | 4    | 0    | 1    | 14    |
| 5001-5100   | 3    | 3    | 5    | 1    | 1    | 13    |
| 5101-5200   | 0    | 3    | 2    | 0    | 3    | 8     |
| 5201-5300   | 1    | 6    | 2    | 2    | 0    | 11    |
| 5301-5400   | 1    | 10   | 3    | 1    | 1    | 16    |
| 5401-5500   | 2    | 3    | 1    | 1    | 1    | 8     |
| 5501-5600   | 1    | 2    | 1    | 1    | 0    | 5     |
| 5601-5700   | 1    | 2    | 3    | 0    | 1    | 7     |
| 5701-5800   | 2    | 3    | 0    | 2    | 0    | 7     |
| 5801-5900   | 0    | 5    | 3    | 1    | 0    | 9     |
| 5901-6000   | 3    | 2    | 1    | 0    | 1    | 7     |
| 6001-6100   | 2    | 1    | 0    | 1    | 0    | 4     |
| 6101-6200   | 2    | 3    | 2    | 0    | 3    | 10    |
| 6201-6300   | 0    | 5    | 2    | 0    | 0    | 7     |
| 6301-6400   | 0    | 0    | 1    | 0    | 0    | 1     |
| 6401-6500   | 0    | 1    | 0    | 1    | 0    | 2     |
| 6501-6600   | 0    | 0    | 0    | 0    | 0    | 0     |
| 6601-6700   | 2    | 1    | 0    | 1    | 0    | 4     |
| 6701-6800   | 0    | 1    | 0    | 0    | 0    | 1     |
| 6801-6900   | 0    | 1    | 0    | 0    | 0    | 1     |
| 6901-7000   | 1    | 0    | 0    | 0    | 0    | 1     |
| 7001-7100   | 0    | 0    | 0    | 0    | 0    | 0     |
| 7101-7200   | 1    | 0    | 0    | 0    | 0    | 1     |
| 7201-7300   | 0    | 1    | 1    | 0    | 0    | 2     |
| 7301-7400   | 0    | 0    | 0    | 0    | 0    | 0     |
| 7401-7500   | 0    | 0    | 1    | 0    | 0    | 1     |
| 7501-7600   | 0    | 1    | 0    | 0    | 0    | 1     |
| 7601-7700   | 1    | 0    | 0    | 0    | 0    | 1     |
| 7701-7800   | 1    | 0    | 1    | 0    | 0    | 2     |
| 7801-7900   | 0    | 0    | 0    | 0    | 1    | 1     |
| 7901-8000   | 2    | 0    | 0    | 0    | 0    | 2     |
| 8001-8100   | 0    | 0    | 0    | 0    | 0    | 0     |
| 8101-8200   | 0    | 0    | 0    | 0    | 0    | 0     |
| 8201-8300   | 0    | 0    | 0    | 0    | 0    | 0     |
| 8301-8400   | 0    | 1    | 0    | 0    | 0    | 1     |
| 8401-8500   | 0    | 1    | 0    | 0    | 0    | 1     |
| 8501-8600   | 0    | 0    | 0    | 0    | 0    | 0     |
| 8601-8700   | 0    | 0    | 0    | 0    | 0    | 0     |
| 8701-8800   | 0    | 0    | 0    | 0    | 0    | 0     |
| 8801-8900   | 0    | 0    | 0    | 0    | 0    | 0     |
| 8901-9000   | 0    | 0    | 0    | 0    | 0    | 0     |
| 9001-9100   | 0    | 0    | 0    | 0    | 0    | 0     |
| 9101-9200   | 0    | 0    | 0    | 0    | 0    | 0     |
| 9201-9300   | 0    | 0    | 0    | 1    | 0    | 1     |
| 9301-9400   | 0    | 0    | 0    | 0    | 0    | 0     |
| 9401-9500   | 0    | 0    | 0    | 0    | 0    | 0     |
| 9501-9600   | 0    | 0    | 0    | 0    | 0    | 0     |
| 9601-9700   | 0    | 0    | 0    | 0    | 0    | 0     |
| 9701-9800   | 0    | 0    | 0    | 0    | 0    | 0     |
| 9801-9900   | 1    | 0    | 0    | 0    | 0    | 1     |
| 9901-10000  | 0    | 1    | 0    | 0    | 0    | 1     |
| 10001-10100 | 0    | 0    | 0    | 0    | 0    | 0     |
| 10101-10200 | 0    | 0    | 1    | 0    | 0    | 1     |
| Total       | 5074 | 4104 | 2531 | 1706 | 6159 | 19574 |

|             |        |        |        |        |        |        |
|-------------|--------|--------|--------|--------|--------|--------|
| 3601-3700   | 0.32   | 0.39   | 0.59   | 0.23   | 0.08   | 0.29   |
| 3701-3800   | 0.20   | 0.19   | 0.40   | 0.23   | 0.02   | 0.17   |
| 3801-3900   | 0.20   | 0.37   | 0.40   | 0.29   | 0.06   | 0.22   |
| 3901-4000   | 0.12   | 0.37   | 0.59   | 0.23   | 0.02   | 0.21   |
| 4001-4100   | 0.04   | 0.24   | 0.40   | 0.29   | 0.03   | 0.15   |
| 4101-4200   | 0.14   | 0.44   | 0.16   | 0.18   | 0.05   | 0.18   |
| 4201-4300   | 0.06   | 0.15   | 0.20   | 0.18   | 0.03   | 0.10   |
| 4301-4400   | 0.08   | 0.24   | 0.47   | 0.12   | 0.05   | 0.16   |
| 4401-4500   | 0.08   | 0.22   | 0.32   | 0.12   | 0.03   | 0.13   |
| 4501-4600   | 0.08   | 0.17   | 0.40   | 0.06   | 0.03   | 0.12   |
| 4601-4700   | 0.04   | 0.02   | 0.40   | 0.18   | 0.00   | 0.08   |
| 4701-4800   | 0.04   | 0.10   | 0.36   | 0.12   | 0.02   | 0.09   |
| 4801-4900   | 0.04   | 0.24   | 0.00   | 0.12   | 0.00   | 0.07   |
| 4901-5000   | 0.04   | 0.17   | 0.16   | 0.00   | 0.02   | 0.07   |
| 5001-5100   | 0.06   | 0.07   | 0.20   | 0.06   | 0.02   | 0.07   |
| 5101-5200   | 0.00   | 0.07   | 0.08   | 0.00   | 0.05   | 0.04   |
| 5201-5300   | 0.02   | 0.15   | 0.08   | 0.12   | 0.00   | 0.06   |
| 5301-5400   | 0.02   | 0.24   | 0.12   | 0.06   | 0.02   | 0.08   |
| 5401-5500   | 0.04   | 0.07   | 0.04   | 0.06   | 0.02   | 0.04   |
| 5501-5600   | 0.02   | 0.05   | 0.04   | 0.06   | 0.00   | 0.03   |
| 5601-5700   | 0.02   | 0.05   | 0.12   | 0.00   | 0.02   | 0.04   |
| 5701-5800   | 0.04   | 0.07   | 0.00   | 0.12   | 0.00   | 0.04   |
| 5801-5900   | 0.00   | 0.12   | 0.12   | 0.06   | 0.00   | 0.05   |
| 5901-6000   | 0.06   | 0.05   | 0.04   | 0.00   | 0.02   | 0.04   |
| 6001-6100   | 0.04   | 0.02   | 0.00   | 0.06   | 0.00   | 0.02   |
| 6101-6200   | 0.04   | 0.07   | 0.08   | 0.00   | 0.05   | 0.05   |
| 6201-6300   | 0.00   | 0.12   | 0.08   | 0.00   | 0.00   | 0.04   |
| 6301-6400   | 0.00   | 0.00   | 0.04   | 0.00   | 0.00   | 0.01   |
| 6401-6500   | 0.00   | 0.02   | 0.00   | 0.06   | 0.00   | 0.01   |
| 6501-6600   | 0.00   | 0.00   | 0.00   | 0.00   | 0.00   | 0.00   |
| 6601-6700   | 0.04   | 0.02   | 0.00   | 0.06   | 0.00   | 0.02   |
| 6701-6800   | 0.00   | 0.02   | 0.00   | 0.00   | 0.00   | 0.01   |
| 6801-6900   | 0.00   | 0.02   | 0.00   | 0.00   | 0.00   | 0.01   |
| 6901-7000   | 0.02   | 0.00   | 0.00   | 0.00   | 0.00   | 0.01   |
| 7001-7100   | 0.00   | 0.00   | 0.00   | 0.00   | 0.00   | 0.00   |
| 7101-7200   | 0.02   | 0.00   | 0.00   | 0.00   | 0.00   | 0.01   |
| 7201-7300   | 0.00   | 0.02   | 0.04   | 0.00   | 0.00   | 0.01   |
| 7301-7400   | 0.00   | 0.00   | 0.00   | 0.00   | 0.00   | 0.00   |
| 7401-7500   | 0.00   | 0.00   | 0.04   | 0.00   | 0.00   | 0.01   |
| 7501-7600   | 0.00   | 0.02   | 0.00   | 0.00   | 0.00   | 0.01   |
| 7601-7700   | 0.02   | 0.00   | 0.00   | 0.00   | 0.00   | 0.01   |
| 7701-7800   | 0.02   | 0.00   | 0.04   | 0.00   | 0.00   | 0.01   |
| 7801-7900   | 0.00   | 0.00   | 0.00   | 0.00   | 0.02   | 0.01   |
| 7901-8000   | 0.04   | 0.00   | 0.00   | 0.00   | 0.00   | 0.01   |
| 8001-8100   | 0.00   | 0.00   | 0.00   | 0.00   | 0.00   | 0.00   |
| 8101-8200   | 0.00   | 0.00   | 0.00   | 0.00   | 0.00   | 0.00   |
| 8201-8300   | 0.00   | 0.00   | 0.00   | 0.00   | 0.00   | 0.00   |
| 8301-8400   | 0.00   | 0.02   | 0.00   | 0.00   | 0.00   | 0.01   |
| 8401-8500   | 0.00   | 0.02   | 0.00   | 0.00   | 0.00   | 0.01   |
| 8501-8600   | 0.00   | 0.00   | 0.00   | 0.00   | 0.00   | 0.00   |
| 8601-8700   | 0.00   | 0.00   | 0.00   | 0.00   | 0.00   | 0.00   |
| 8701-8800   | 0.00   | 0.00   | 0.00   | 0.00   | 0.00   | 0.00   |
| 8801-8900   | 0.00   | 0.00   | 0.00   | 0.00   | 0.00   | 0.00   |
| 8901-9000   | 0.00   | 0.00   | 0.00   | 0.00   | 0.00   | 0.00   |
| 9001-9100   | 0.00   | 0.00   | 0.00   | 0.00   | 0.00   | 0.00   |
| 9101-9200   | 0.00   | 0.00   | 0.00   | 0.00   | 0.00   | 0.00   |
| 9201-9300   | 0.00   | 0.00   | 0.00   | 0.06   | 0.00   | 0.01   |
| 9301-9400   | 0.00   | 0.00   | 0.00   | 0.00   | 0.00   | 0.00   |
| 9401-9500   | 0.00   | 0.00   | 0.00   | 0.00   | 0.00   | 0.00   |
| 9501-9600   | 0.00   | 0.00   | 0.00   | 0.00   | 0.00   | 0.00   |
| 9601-9700   | 0.00   | 0.00   | 0.00   | 0.00   | 0.00   | 0.00   |
| 9701-9800   | 0.00   | 0.00   | 0.00   | 0.00   | 0.00   | 0.00   |
| 9801-9900   | 0.02   | 0.00   | 0.00   | 0.00   | 0.00   | 0.01   |
| 9901-10000  | 0.00   | 0.02   | 0.00   | 0.00   | 0.00   | 0.01   |
| 10001-10100 | 0.00   | 0.00   | 0.00   | 0.00   | 0.00   | 0.00   |
| 10101-10200 | 0.00   | 0.00   | 0.04   | 0.00   | 0.00   | 0.01   |
| Total       | 100.00 | 100.00 | 100.00 | 100.00 | 100.00 | 100.00 |
