# Supplementary material for: Integrative Annotation of 21,037 Human Genes Validated by Full-Length cDNA Clones
Source: PubMed Central journal article supplement (PMC393292; doi:10.1371/journal.pbio.0020162), 2004-04-20
Supplement: pbio.0020162.sg001.pdf [file pbio.0020162.sg001.pdf]

**Figure S1. Prediction of ORFs**  
**(A) Schematic diagram for the prediction of ORFs.**

This diagram illustrates the ORF prediction method used on all H-Inv cDNAs. The method was based upon the alignment of similarity searches using FASTY and BLASTX. Gene prediction was carried out using GeneMark. Prior to the prediction of ORFs, we judged if a sequence had any frameshift errors or remaining introns. During ORF prediction, we corrected those sequence irregularities computationally. Details of how sequence irregularities were predicted are described in (B) and (C).

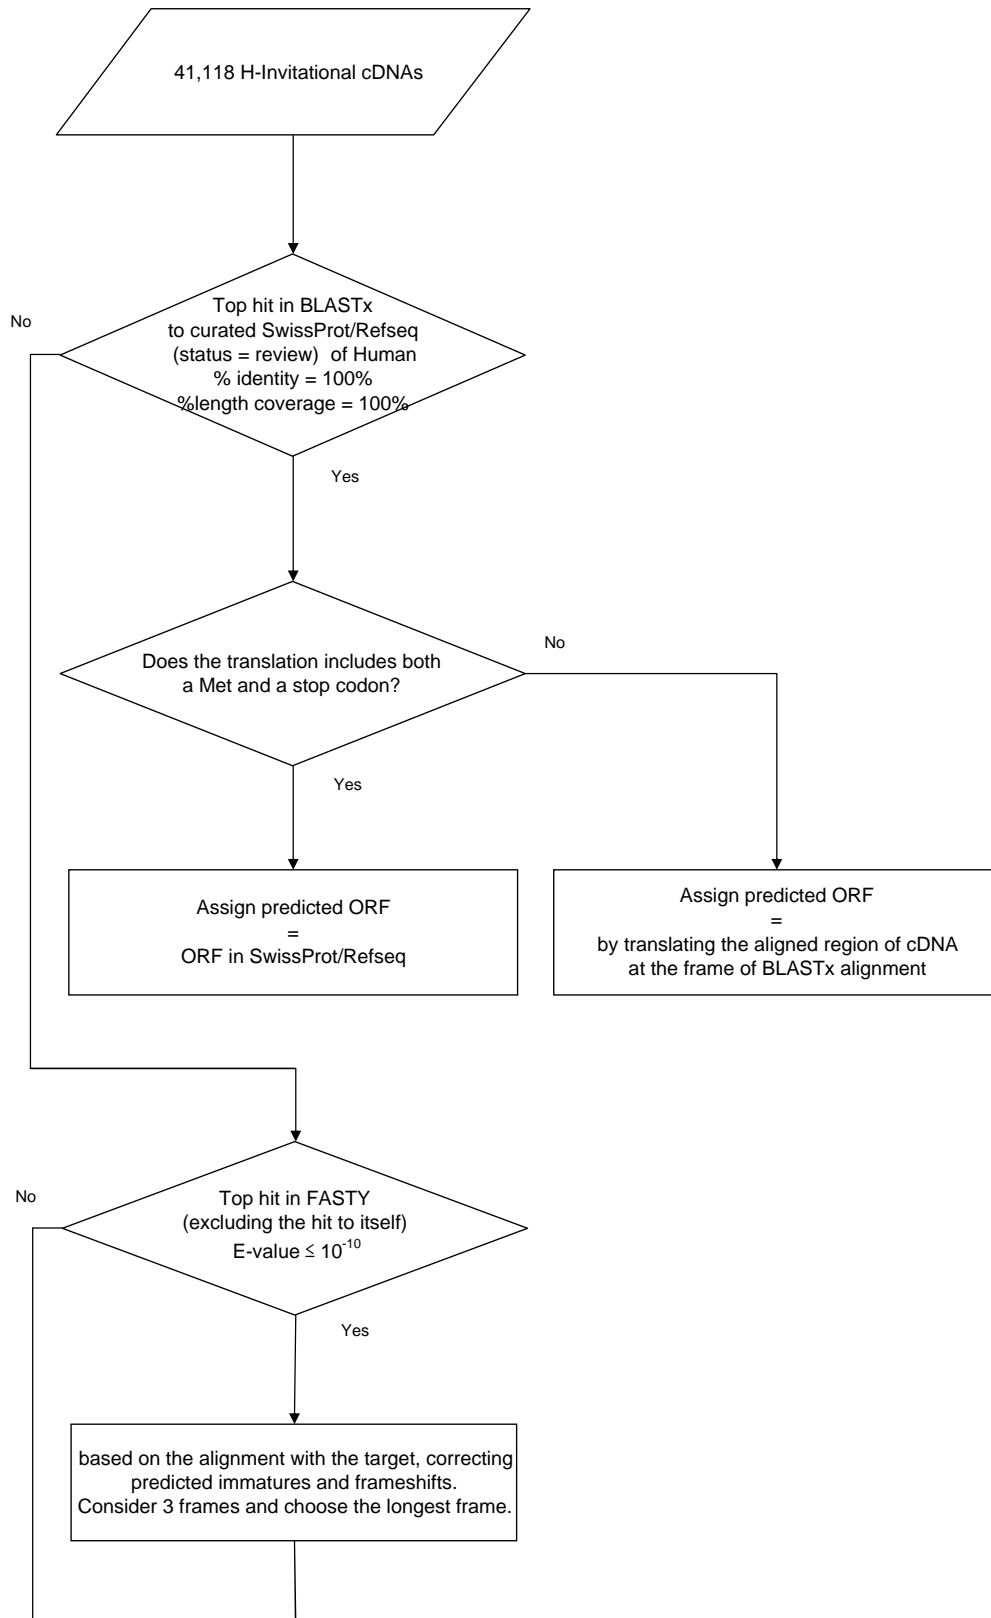

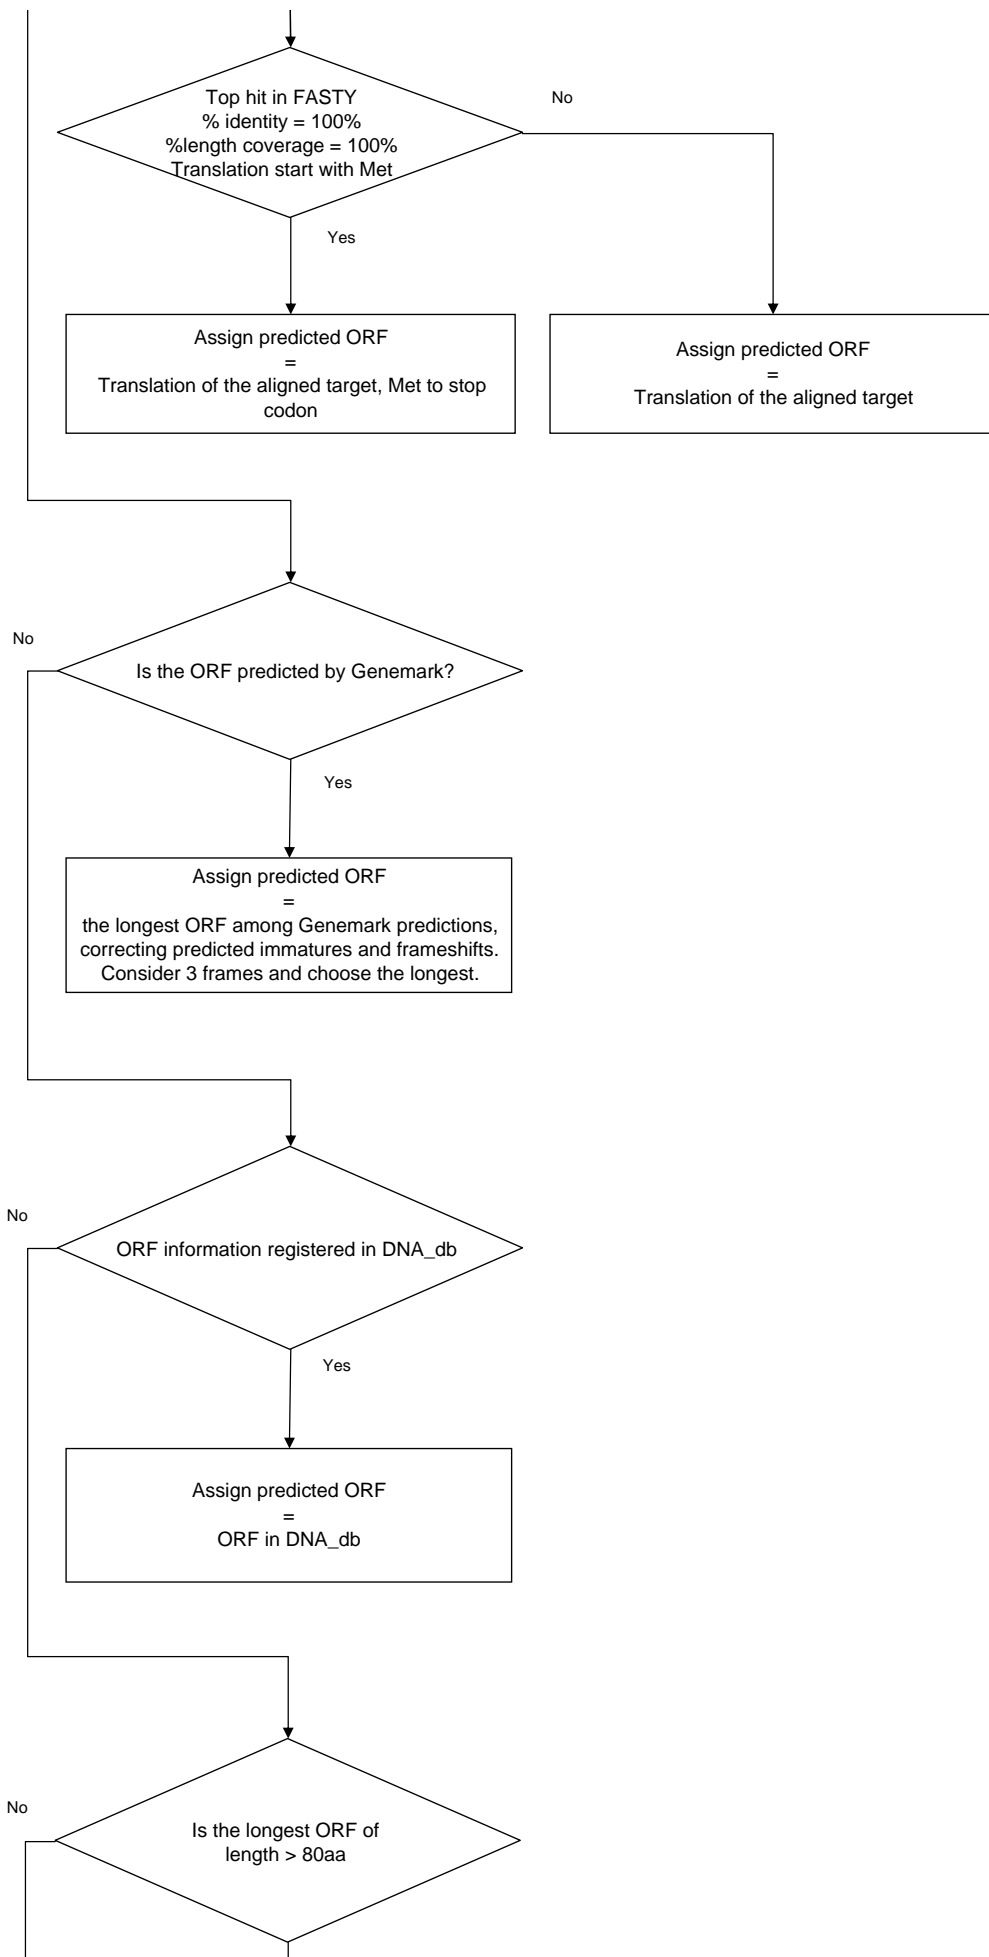

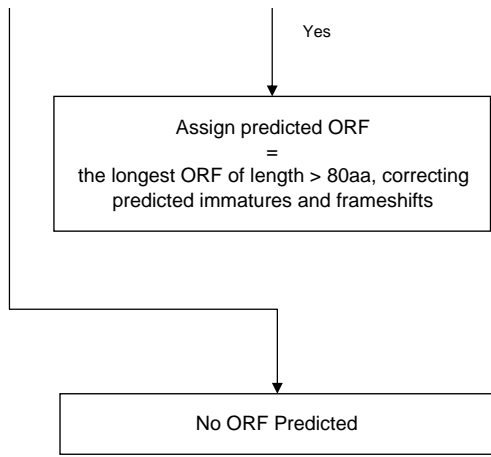

**Figure S1. Prediction of ORFs**  
**(B) Schematic diagram for prediction of unspliced introns.**

This schematic diagram illustrates the prediction method used for unspliced introns.

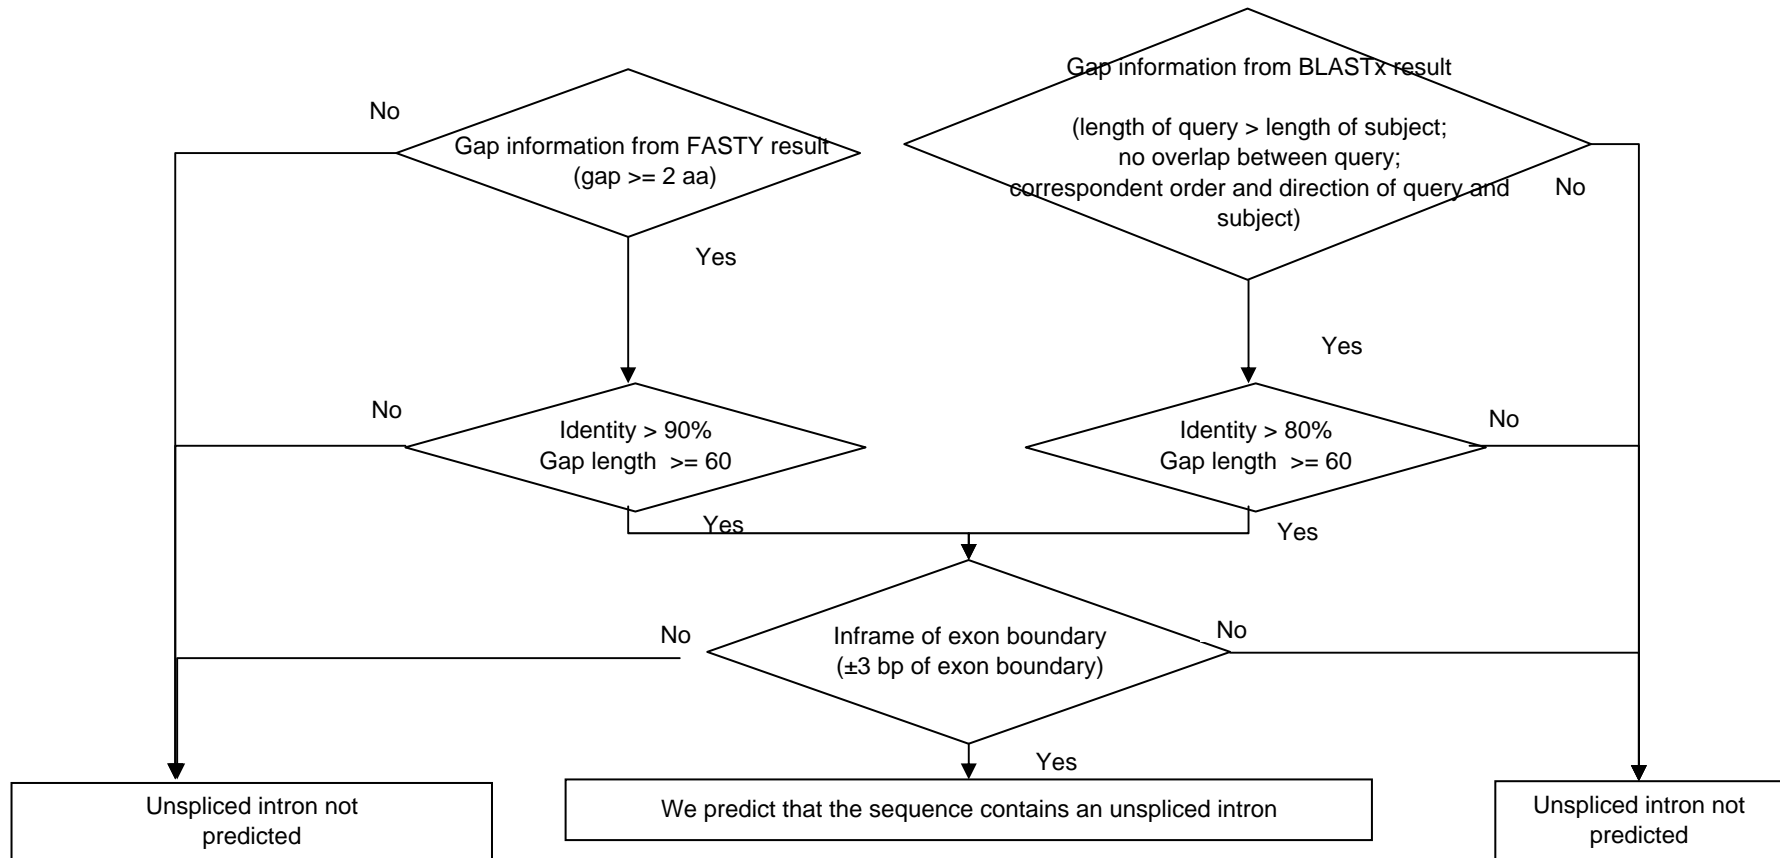

## Figure S1. Prediction of ORFs

### (C) Schematic diagram for prediction of frameshift errors.

Frameshift errors were inferred from cDNA–genome pairwise alignment gaps due to insertion or deletion, exception of multiple of 3 bp, or over 10 bp in either the query cDNA or genome.

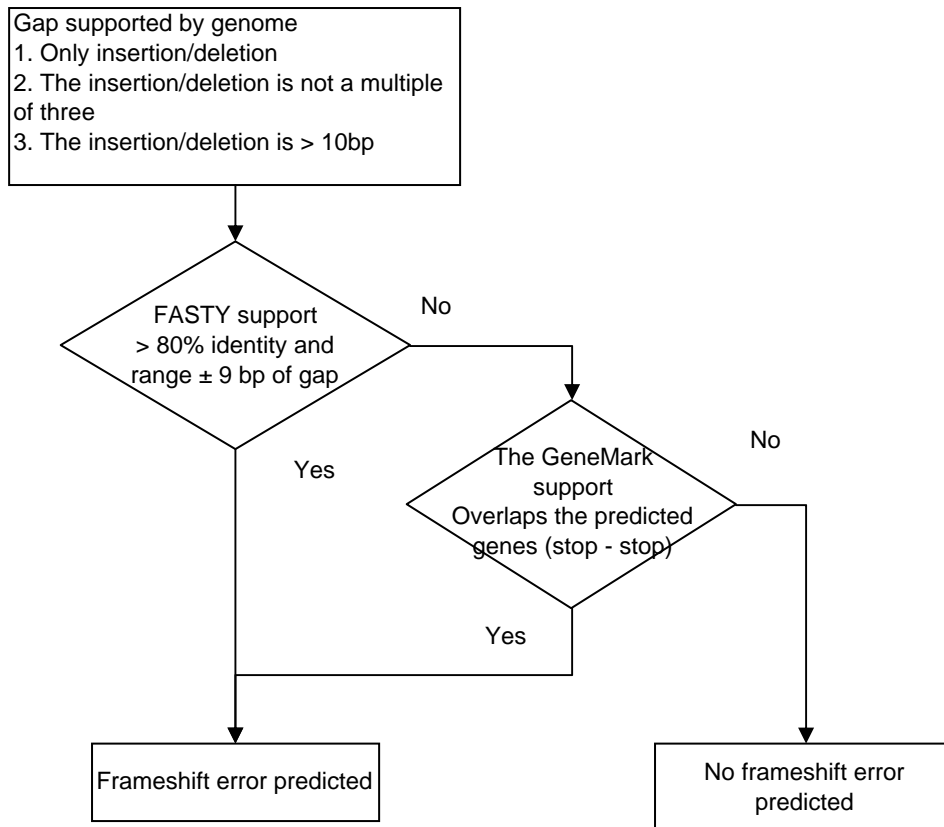

## Figure S1. Prediction of ORFs

### **(D) The statistics for the predicted frameshifts and unspliced introns.**

| Irregularity     | Category I protein | Category II protein | Category III protein | Category IV protein | Category V protein | Total |
|------------------|--------------------|---------------------|----------------------|---------------------|--------------------|-------|
| Frame shifts     | 48                 | 117                 | 71                   | 60                  | 38                 | 372   |
| Unspliced intron | 290                | 456                 | 131                  | 87                  | 46                 | 1056  |
