# Supplementary material for: Integrative Annotation of 21,037 Human Genes Validated by Full-Length cDNA Clones
Source: PubMed Central journal article supplement (PMC393292; doi:10.1371/journal.pbio.0020162), 2004-04-20

**Figure S6.**

**Numbers of Representative H-Inv cDNAs That Are Homologous to Proteins in Each Taxonomic Group**

Two thresholds ( $E < 10^{-5}$ , white bars, and  $E < 10^{-10}$ , black bars) were employed. The “animal” group does not include mammalian species. The “eukaryote” group represents eukaryotic species other than animals, fungi, and plants.

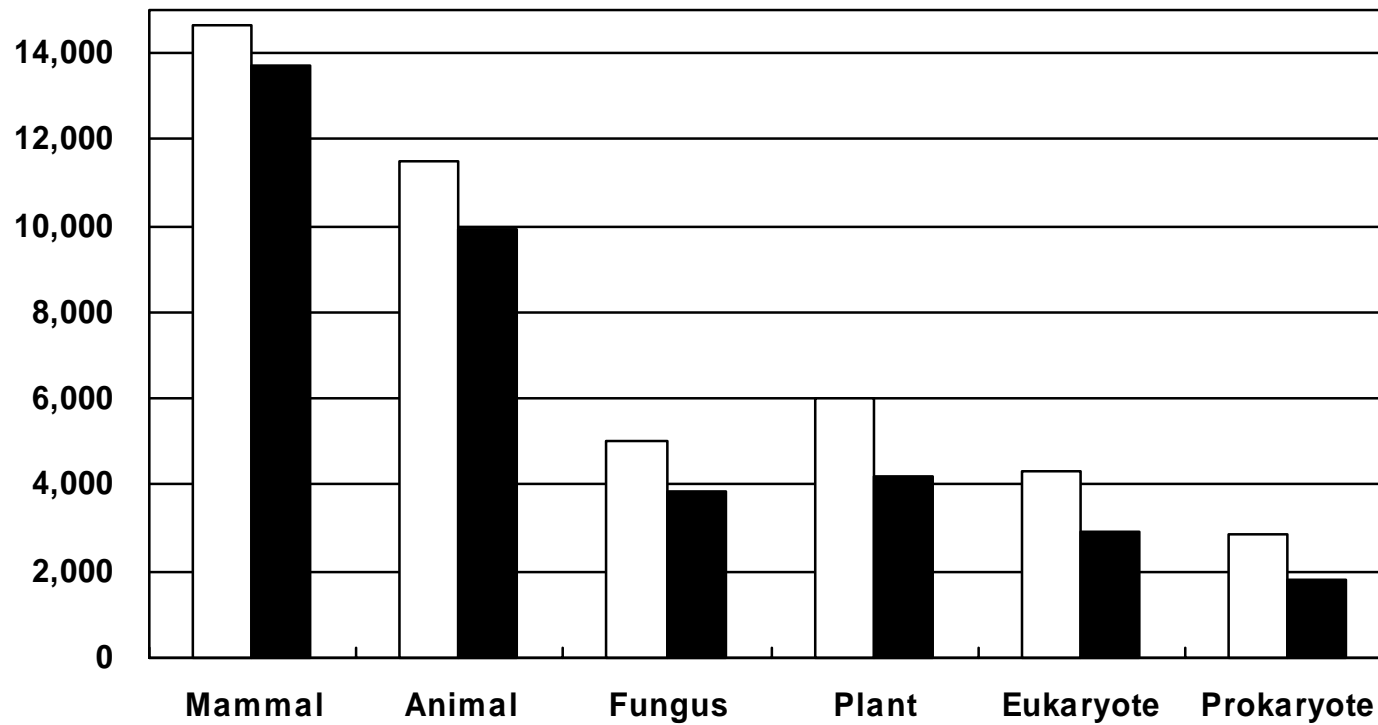

Supplement: pbio.0020162.sg006.pdf [file pbio.0020162.sg006.pdf]
