# Supplementary material for: Integrative Annotation of 21,037 Human Genes Validated by Full-Length cDNA Clones
Source: PubMed Central journal article supplement (PMC393292; doi:10.1371/journal.pbio.0020162), 2004-04-20
Supplement: pbio.0020162.sg009.pdf [file pbio.0020162.sg009.pdf]

# Figure S9. H-Inv Annotation Viewers

## (A) G-integra: A gemome mapping viewer.

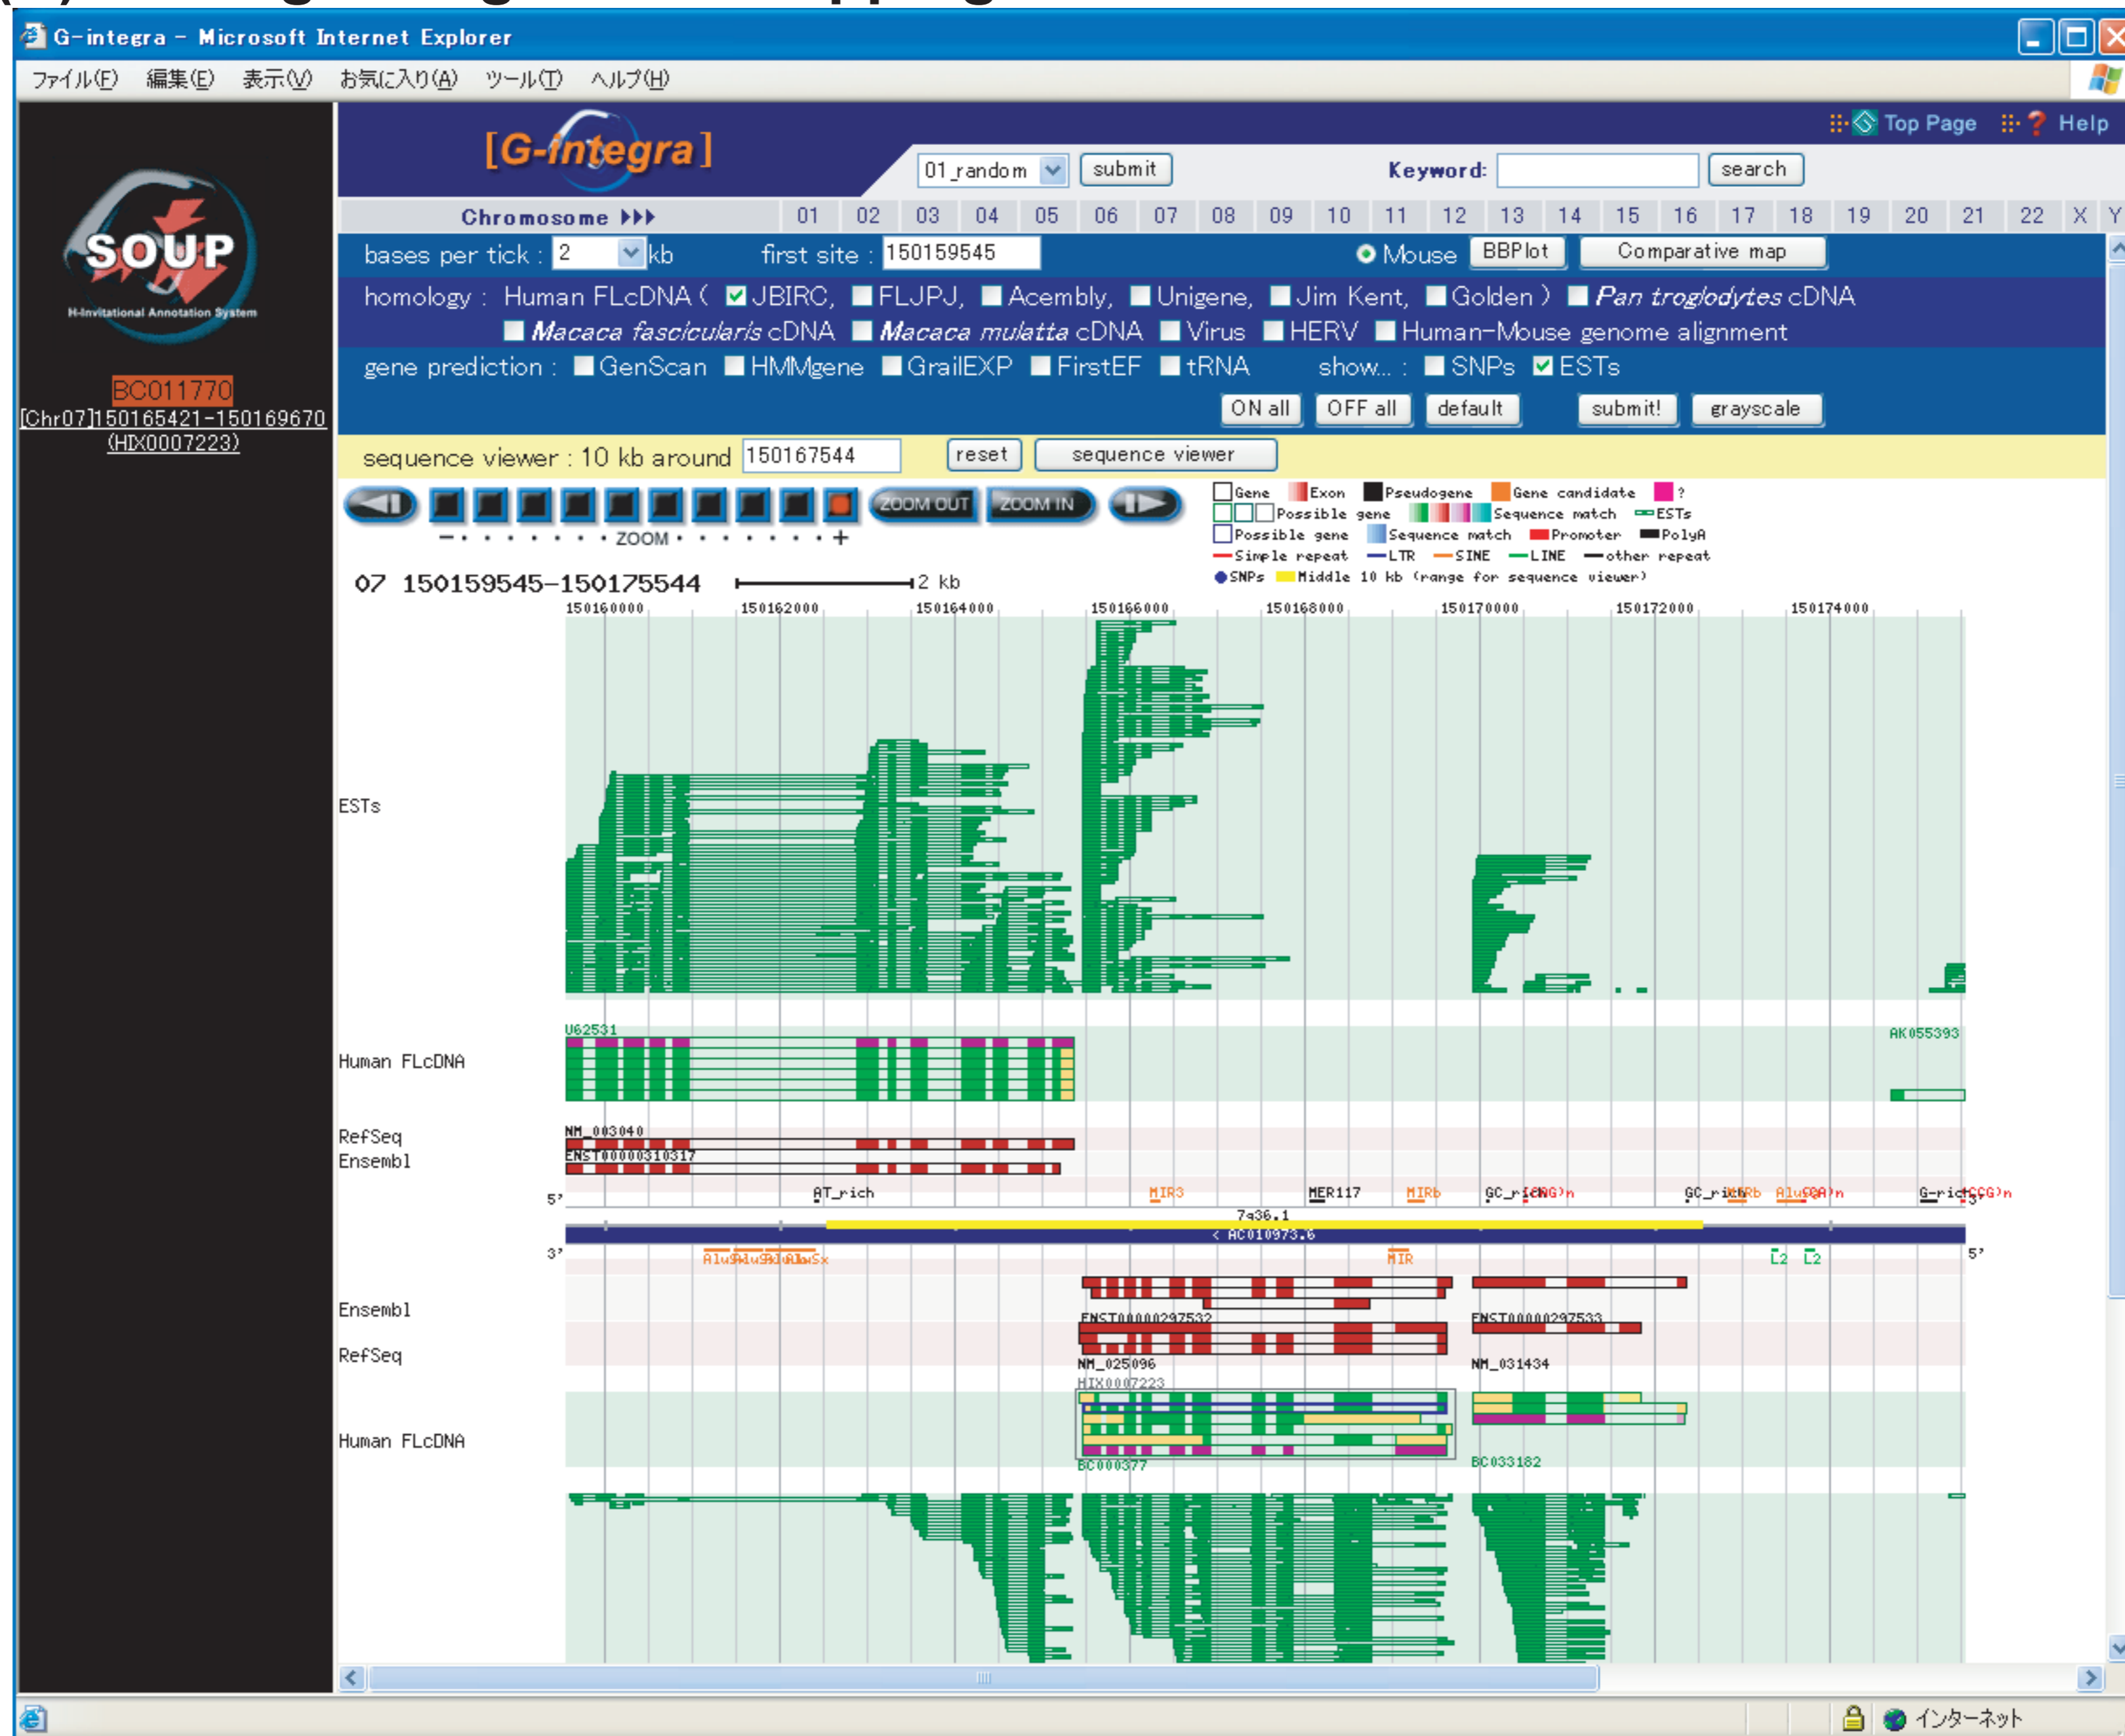

# Figure S9. H-Inv Annotation Viewers

## (B) SOUP Locus annotation Viewer.

Accession List - SOUP - Microsoft Internet Explorer

ファイル(E) 編集(E) 表示(V) お気に入り(A) ツール(T) ヘルプ(H)

[Go to Assignment List](#)
[Go to Top Page](#)

[Old ID\(HosaC ID\) <--> New ID\(HIT/HIX\)](#)

### Location

| Locus ID   | Chr | Chr band | Start  | End    | Strand | Alternative Splice                             | H-Angel | CW(ORF) | CW(cDNA) | Disease Info Viewer |
|------------|-----|----------|--------|--------|--------|------------------------------------------------|---------|---------|----------|---------------------|
| HIX0000009 | 01  | 1p36.33  | 392700 | 407762 | -      | 3 isoforms<br>S I A D<br><a href="#">Trace</a> |         |         |          |                     |

### Mapped cDNA

|                                  | H-Invitational ID            | Accession No | Start  | End    | Grade | Wk Group | Status | Clustering              | G-Integra | SMO Viewer | Splicing variant(s) | Revision |
|----------------------------------|------------------------------|--------------|--------|--------|-------|----------|--------|-------------------------|-----------|------------|---------------------|----------|
| <input type="radio"/>            | <a href="#">HIT000006030</a> | AK022756     | 392700 | 402572 | A     | D        |        | <a href="#">Cluster</a> |           |            |                     |          |
| <input type="radio"/>            | <a href="#">HIT000007558</a> | AK024284     | 392700 | 407743 | A     | D        |        | <a href="#">Cluster</a> |           |            |                     |          |
| <input type="radio"/>            | <a href="#">HIT000017358</a> | AK092491     | 392700 | 395274 |       | D        |        | <a href="#">Cluster</a> |           |            |                     |          |
| <input checked="" type="radio"/> | <a href="#">HIT000023917</a> | AL050019     | 392712 | 407741 | S     | D        |        | <a href="#">Cluster</a> |           |            |                     |          |
| <input type="radio"/>            | <a href="#">HIT000031593</a> | BC003555     | 392712 | 407762 | A     | D        |        | <a href="#">Cluster</a> |           |            |                     |          |

Comments for Representative (s)

3'UTR   
  5'UTR   
  All partial   
  Clustering error  
 Irregular mapping   
 Fused locus(Read through)   
 Genomic Contamination   
 Others

Tissue-specific expression

インターネット

# Figure S9. H-Inv Annotation Viewers

## (C) SOUP cDNA annotation Viewer.

AnnotationViewer - SOUP - Microsoft Internet Explorer

### Annotation Viewer Close

| H-Invitational ID | Locus ID  | Accession No | Definition of DNA Databanks                                                              | Clone No                   | Cell Type                   | Tissue Type | Data provider |
|-------------------|-----------|--------------|------------------------------------------------------------------------------------------|----------------------------|-----------------------------|-------------|---------------|
| HIT000035440      | HD0007223 | BC011770     | Homo sapiens, Similar to FAST kinase, clone MGC:19784 IMAGE:3831196, mRNA, complete cds. | MGC:19784<br>IMAGE:3831196 | "skin, melanotic melanoma." |             | MGC_NCI       |

DNA Database  
  Repeat Mask  
  Protein Sequence  
  Locus Link  
  Reference  
  G-Integra  
 Similarity Search  
  Mi Viewer  
  TRANSFAC  
  GTOP  
  FASTA Server  
  BLAST Server

[cDNA Viewer](#)  
[KEGG OMIM](#)  
[cDNA-Genome](#)  
[Pairwise Alignment](#) / 
 [Multiple Alignment](#)

| Homologous Gene                             | Identity(%) | E-Value  |
|---------------------------------------------|-------------|----------|
| <i>Homo sapiens</i> <a href="#">Q14296</a>  | 100         | 7.4e-131 |
| Vertebrates <a href="#">Q9JDX9</a>          | 89.32       | 6.9e-108 |
| Eukaryotes <a href="#">Q16161</a>           | 28.261      | 0.00026  |
| Bacteria and Viruses <a href="#">Q41972</a> | 30.135      | 3.3e-06  |

**Definition**  
[Similarity Search](#)  
 3D-keynote

Data Source:

Evidence:  FASTY  
 BLAST-X  
 BLAST-X RefSeq/SWISS-PROT  
 BLAST-N  
 InterProScan

Identity (Data Source): 100

Coverage (Data Source): 100

Species:

Definition:

Similarity:

Identical to known human protein(Category I).  
 Similar to known protein(Category II).  
 IPR domain containing protein(Category III).  
 Conserved hypothetical protein(Category IV).  
 Hypothetical protein(Category V).

Gene Name(Symbol) (DDBJ/EMBL/GenBank):

Gene Name(Symbol) (SWISS-PROT&RefSeq):

HUGO Approved Gene Symbol (GeneW): New Name

EC Number (DDBJ/EMBL/GenBank):

EC Number (SWISS-PROT&RefSeq):

EC Number (InterPro&GO):

EC Number (H-inv conclusion): EC 2.7.1.- (SWISS-PROT&RefSeq)

frameshift error  
 5' truncated  
 3' truncated  
 fragment  
 splicing variant  
 immature  
 chimeric sequence  
 nonsense mutation  
 N-terminus truncated  
 C-terminus truncated  
 ORF questionable  
 No CDS in database

# Figure S9. H-Inv Annotation Viewers

## (D) SMOViewer: The similarity, motif and ORF information viewer.

**SMO-Viewer - Microsoft Internet Explorer**

ファイル(F) 編集(E) 表示(V) お気に入り(A) ツール(T) ヘルプ(H)

### SMO-Viewer

**DNA databank information**

Accession [BC010859](#)  
 Definition Homo sapiens, procollagen-proline, 2-oxoglutarate 4-dioxygenase (proline 4-hydroxylase), beta polypeptide (protein disulfide isomerase; thyroid hormone binding protein p55), clone MGC:9192 IMAGE:3879411, mRNA, complete cds.  
 CDS  
 Product procollagen-proline, 2-oxoglutarate  
 Function none  
 ProteinID AAH10859.1

1 ————— 2438  
 45 ————— 1571

**Motif search & gene prediction viewer**

Fsh/imm frame ORF A.A. Length Grade  
 +3 45 ————— 1571 508 S1

Met/Stop +1  
 Met/Stop +2  
 Met/Stop +3  
 Met/Stop -1  
 Met/Stop -2  
 Met/Stop -3

frame Genemark-#  
 +3 36 ————— 1571  
 +3 45 ————— 1571  
 +3 75 ————— 1571  
 +3 87 ————— 1571  
 +3 126 ————— 1571  
 +3 30 ————— 1571

Motif 174 ▶ 200  
 198 ▶ 227  
 327 ▶ 362

| A.A. Length | Program    | IPR                       | Name                    | Type   |
|-------------|------------|---------------------------|-------------------------|--------|
| 9           | FPrintScan | <a href="#">IPR000063</a> | Thioredoxin type domain | Domain |
| 10          | FPrintScan | <a href="#">IPR000063</a> | Thioredoxin type domain | Domain |
| 12          | FPrintScan | <a href="#">IPR000063</a> | Thioredoxin type domain | Domain |

Select program  
 FASTY 3.4t11  
 NCBI-BLASTX 2.0.11  
 NCBI-BLASTX 2.0.11 (RefSeq+Swissprot)  
 NCBI-BLASTN 2.2.2

Select Identity  
 >=75%  
 >=50%  
 >=25%  
 all

Select E-Value  
 0  
 0-10 -10  
 all

Select organism  
 Homo sapiens  
 Vertebrate (non Homo sapiens)  
 Eukaryote (non Vertebrate)  
 Bacteria & Virus  
 Others

FASTY 3.4t11 selfprotein ID auto-annotation self= auto current definition

| Dcl                              | Scl                   | Transfer               | A.A. Length                             | Identity(%)                             | Score   | E-Value | Species  | Description |                                                                                                                                               |
|----------------------------------|-----------------------|------------------------|-----------------------------------------|-----------------------------------------|---------|---------|----------|-------------|-----------------------------------------------------------------------------------------------------------------------------------------------|
| <input checked="" type="radio"/> | <input type="radio"/> | <a href="#">P07237</a> | 45 ————— 1568 bp<br>N ————— C<br>508 aa | <input type="button" value="OrgAlign"/> | 100.000 | 2707.9  | 3.9e-143 | Hom         | Protein disulfide isomerase precursor (PDI) (EC 5.3.4.1) (Prolyl 4-hydroxylase beta subunit) (Cellular thyroid hormone binding protein) (P55) |
| <input type="radio"/>            | <input type="radio"/> | <a href="#">P05307</a> | 45 ————— 1568 bp<br>N ————— C<br>510 aa | <input type="button" value="OrgAlign"/> | 94.902  | 2587.0  | 2.2e-136 | Verteb      | Protein disulfide isomerase precursor (PDI) (EC 5.3.4.1) (Prolyl 4-hydroxylase beta subunit) (Cellular thyroid hormone binding protein) (P55) |
| <input type="radio"/>            | <input type="radio"/> | <a href="#">Q8R4U2</a> | 45 ————— 1568 bp<br>N ————— C<br>508 aa | <input type="button" value="OrgAlign"/> | 93.529  | 2541.8  | 7.1e-134 | Verteb      | Protein disulfide-isomerase (EC 5.3.4.1)                                                                                                      |

インターネット
