# Supplementary material for: Integrative Annotation of 21,037 Human Genes Validated by Full-Length cDNA Clones
Source: PubMed Central journal article supplement (PMC393292; doi:10.1371/journal.pbio.0020162), 2004-04-20
Supplement: pbio.0020162.st001.pdf [file pbio.0020162.st001.pdf]

**Table S1. Gene Structure**  
**(A) Gene structure of the cDNAs.**

|                                         | Median | Mean $\pm$ s.d.     |
|-----------------------------------------|--------|---------------------|
| Number of exons                         | 5      | 7 $\pm$ 7           |
| Extent of the genome (bp)               | 10,813 | 35,071 $\pm$ 72,869 |
| The length of the first exons (bp)      | 148    | 251 $\pm$ 360       |
| The length of the internal exons (bp)   | 122    | 153 $\pm$ 182       |
| The length of the last exons (bp)       | 786    | 1,076 $\pm$ 946     |
| The length of the first introns (bp)    | 3,152  | 11,891 $\pm$ 27,543 |
| The length of the internal introns (bp) | 1,436  | 4,676 $\pm$ 14,417  |
| The length of the last introns (bp)     | 1,352  | 4,127 $\pm$ 12,651  |

**Table S1. Gene Structure****(B) The frequencies and varieties of repetitive sequences found in the cDNAs.**

A list of the 20,899 loci representing cDNAs that RepeatMasker showed contained repetitive elements.

| Repeats         | Number of cDNAs |
|-----------------|-----------------|
| SINE/Alu        | 6,093           |
| SINE/MIR        | 2,826           |
| LINE/L1         | 2,465           |
| LINE/L2         | 1,827           |
| LTR/MaLR        | 1,411           |
| DNA/MER1_type   | 1,279           |
| LTR/ERV1        | 934             |
| LTR/ERVL        | 503             |
| DNA/MER2_type   | 434             |
| LINE/CR1        | 270             |
| DNA/AcHobo      | 136             |
| DNA/Tip100      | 105             |
| LTR/ERVK        | 95              |
| DNA/Mariner     | 95              |
| DNA             | 85              |
| DNA/MER1_type?  | 54              |
| snRNA           | 35              |
| DNA/Tc2         | 33              |
| Satellite       | 27              |
| Other           | 27              |
| tRNA            | 23              |
| Satellite/centr | 17              |
| scRNA           | 16              |
| DNA/T2_type     | 14              |
| srpRNA          | 12              |
| LTR/ERV         | 9               |
| rRNA            | 8               |
| Satellite/telo  | 8               |
| Unknown         | 6               |
| RNA             | 4               |

**Table S1. Gene Structure****(C) The positions (5' UTR, ORF, 3' UTR) of repetitive sequences in the protein-coding cDNAs.**

A total of 1,863 cDNAs contained repetitive sequences in their ORF, of which 549 had repetitive sequences within their most probable ORF. Repetitive sequences appeared in 2,240 and 5,401 cDNAs in their 5' UTRs and 3' UTRs, respectively.

| 5' UTR          |                   |      | ORF             |                   |      | 3' UTR          |                   |      |
|-----------------|-------------------|------|-----------------|-------------------|------|-----------------|-------------------|------|
| Repeats         | Number of repeats | %    | Repeats         | Number of repeats | %    | Repeats         | Number of repeats | %    |
| SINE/Alu        | 428               | 21.5 | LINE/L1         | 223               | 20.3 | SINE/Alu        | 2,824             | 42.9 |
| SINE/MIR        | 322               | 16.2 | SINE/Alu        | 217               | 19.8 | SINE/MIR        | 819               | 12.5 |
| LINE/L1         | 304               | 15.3 | LTR/MaLR        | 122               | 11.1 | LINE/L1         | 758               | 11.5 |
| LTR/MaLR        | 200               | 10.1 | LTR/ERV1        | 118               | 10.8 | LINE/L2         | 469               | 7.1  |
| LINE/L2         | 189               | 9.5  | LINE/L2         | 107               | 9.8  | LTR/MaLR        | 407               | 6.2  |
| LTR/ERV1        | 175               | 8.8  | SINE/MIR        | 105               | 9.6  | LTR/ERV1        | 371               | 5.6  |
| DNA/MER1_type   | 114               | 5.7  | LTR/ERVL        | 50                | 4.6  | DNA/MER1_type   | 310               | 4.7  |
| LTR/ERVL        | 70                | 3.5  | DNA/MER1_type   | 44                | 4.0  | LTR/ERVL        | 159               | 2.4  |
| DNA/MER2_type   | 49                | 2.5  | LTR/ERVK        | 30                | 2.7  | DNA/MER2_type   | 134               | 2.0  |
| LTR/ERVK        | 34                | 1.7  | DNA/MER2_type   | 28                | 2.6  | LINE/CR1        | 62                | 0.9  |
| LINE/CR1        | 18                | 0.9  | LINE/CR1        | 10                | 0.9  | LTR/ERVK        | 59                | 0.9  |
| DNA/AcHobo      | 16                | 0.8  | Other           | 6                 | 0.5  | DNA/AcHobo      | 32                | 0.5  |
| Satellite       | 8                 | 0.4  | DNA/Tip100      | 5                 | 0.5  | DNA/Tip100      | 31                | 0.5  |
| DNA/Mariner     | 8                 | 0.4  | DNA/Mariner     | 5                 | 0.5  | DNA/Mariner     | 29                | 0.4  |
| DNA/MER1_type?  | 7                 | 0.4  | DNA/AcHobo      | 5                 | 0.5  | DNA             | 25                | 0.4  |
| DNA             | 7                 | 0.4  | Satellite/centr | 4                 | 0.4  | DNA/MER1_type?  | 22                | 0.3  |
| snRNA           | 6                 | 0.3  | Satellite       | 4                 | 0.4  | snRNA           | 15                | 0.2  |
| Satellite/centr | 5                 | 0.3  | DNA/T2_type     | 3                 | 0.3  | Other           | 13                | 0.2  |
| Satellite/telo  | 4                 | 0.2  | snRNA           | 2                 | 0.2  | DNA/Tc2         | 11                | 0.2  |
| Other           | 4                 | 0.2  | Satellite/telo  | 2                 | 0.2  | tRNA            | 5                 | 0.1  |
| DNA/Tc2         | 4                 | 0.2  | tRNA            | 1                 | 0.1  | Satellite       | 4                 | 0.1  |
| DNA/T2_type     | 4                 | 0.2  | srpRNA          | 1                 | 0.1  | srpRNA          | 3                 | 0.0  |
| tRNA            | 3                 | 0.2  | scRNA           | 1                 | 0.1  | scRNA           | 3                 | 0.0  |
| DNA/Tip100      | 3                 | 0.2  | DNA/Tc2         | 1                 | 0.1  | Satellite/centr | 3                 | 0.0  |
| Unknown         | 2                 | 0.1  | DNA/MER1_type?  | 1                 | 0.1  | RNA             | 2                 | 0.0  |
| srpRNA          | 1                 | 0.1  | DNA             | 1                 | 0.1  | LTR/ERV         | 2                 | 0.0  |
| scRNA           | 1                 | 0.1  |                 |                   |      | DNA/T2_type     | 2                 | 0.0  |
| rRNA            | 1                 | 0.1  |                 |                   |      | rRNA            | 1                 | 0.0  |
|                 |                   |      |                 |                   |      | Satellite/telo  | 1                 | 0.0  |
