# Supplementary material for: Integrative Annotation of 21,037 Human Genes Validated by Full-Length cDNA Clones
Source: PubMed Central journal article supplement (PMC393292; doi:10.1371/journal.pbio.0020162), 2004-04-20

**Table S3. Tissue Library Origins of H-Inv Proteins**

The results of classification into five similarity categories for each of ten tissue classes.

**(A) Numbers of H-Inv proteins.**

| Tissue library origin | Category I protein | Category II protein | Category III protein | Category IV protein | Category V protein | total  |
|-----------------------|--------------------|---------------------|----------------------|---------------------|--------------------|--------|
| Neural                | 1,076              | 1,061               | 724                  | 413                 | 1,390              | 4,664  |
| Blood/spleen/LND      | 476                | 348                 | 203                  | 128                 | 501                | 1,656  |
| Dermal_connective     | 528                | 294                 | 176                  | 171                 | 336                | 1,505  |
| Placenta/testis/ovary | 1,016              | 847                 | 521                  | 372                 | 1,266              | 4,022  |
| Muscle/heart          | 212                | 143                 | 79                   | 42                  | 158                | 634    |
| Stomach/colon         | 250                | 221                 | 124                  | 96                  | 427                | 1,118  |
| Liver                 | 108                | 103                 | 70                   | 42                  | 116                | 439    |
| Lung                  | 503                | 192                 | 110                  | 92                  | 267                | 1,164  |
| Kidney/bladder        | 257                | 147                 | 71                   | 46                  | 158                | 679    |
| Endocrine_exocrine    | 297                | 245                 | 113                  | 81                  | 575                | 1,311  |
| total                 | 5,069              | 4,103               | 2,531                | 1,705               | 6,159              | 19,567 |

**(B) Histogram.**

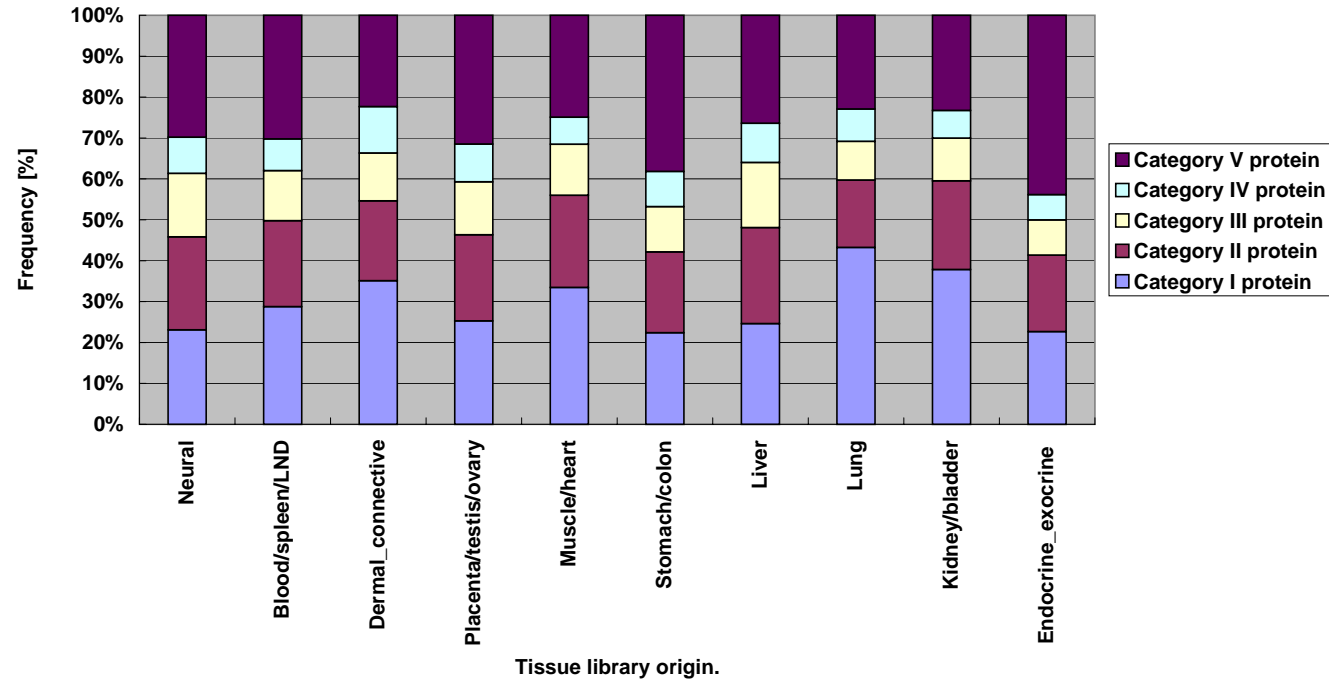

Supplement: pbio.0020162.st003.pdf [file pbio.0020162.st003.pdf]
