# Supplementary material for: Integrative Annotation of 21,037 Human Genes Validated by Full-Length cDNA Clones
Source: PubMed Central journal article supplement (PMC393292; doi:10.1371/journal.pbio.0020162), 2004-04-20
Supplement: pbio.0020162.st004.pdf [file pbio.0020162.st004.pdf]

**Table S4. The InterPro IDs Identified in H-Inv Proteins**

The top 40 InterPro IDs identified in H-Inv proteins and proteins from other species are listed for all types (A) and for each type of family, domain, and repeat (B–D). Analyses were conducted by InterPro ver. 3.1. Nonredundant proteome datasets of other species were obtained from the following sites: fly (*Drosophila melanogaster*; <http://flybase.bio.indiana.edu/>), worm (*Caenorhabditis elegans*; <http://www.wormbase.org/>), budding yeast (*Saccharomyces cerevisiae*; <http://www.pasteur.fr/externe>), fission yeast (*Schizosaccharomyces pombe*; <http://www.sanger.ac.uk/>), plant (*Arabidopsis thaliana*; <http://mips.gsf.de/proj/thal/index.html>), and bacteria (*Escherichia coli* K12; [ftp://ftp.ncbi.nih.gov/genbank/genomes/Bacteria/Escherichia\\_coli\\_K12/](ftp://ftp.ncbi.nih.gov/genbank/genomes/Bacteria/Escherichia_coli_K12/)).

**(A) The top 40 InterPro IDs identified in H-Inv proteins.**

| InterPro ID | Human           |      | Fly             |      | Worm            |      | Budding Yeast   |      | Fission Yeast   |      | Plant           |      | Bacteria        |      | Name                                             | Type   |
|-------------|-----------------|------|-----------------|------|-----------------|------|-----------------|------|-----------------|------|-----------------|------|-----------------|------|--------------------------------------------------|--------|
|             | No. of proteins | Rank | No. of proteins | Rank | No. of proteins | Rank | No. of proteins | Rank | No. of proteins | Rank | No. of proteins | Rank | No. of proteins | Rank |                                                  |        |
| IPR000822   | 549             | 1    | 393             | 2    | 184             | 13   | 47              | 13   | 25              | 15   | 139             | 21   | 0               | NA   | Zn-finger, C2H2 type                             | Domain |
| IPR000719   | 271             | 2    | 379             | 3    | 544             | 2    | 118             | 1    | 110             | 2    | 1040            | 1    | 1               | 710  | Eukaryotic protein kinase                        | Family |
| IPR002290   | 251             | 3    | 359             | 4    | 516             | 3    | 114             | 2    | 107             | 3    | 1008            | 2    | 0               | NA   | Serine/Threonine protein kinase                  | Family |
| IPR001245   | 231             | 4    | 335             | 5    | 419             | 5    | 105             | 3    | 98              | 4    | 985             | 3    | 0               | NA   | Tyrosine protein kinase                          | Family |
| IPR003599   | 229             | 5    | 148             | 12   | 82              | 41   | 0               | NA   | 0               | NA   | 0               | NA   | 0               | NA   | Immunoglobulin subtype                           | Domain |
| IPR001680   | 223             | 6    | 223             | 9    | 151             | 17   | 98              | 4    | 116             | 1    | 236             | 11   | 0               | NA   | G-protein beta WD-40 repeat                      | Repeat |
| IPR003006   | 220             | 7    | 146             | 13   | 83              | 40   | 0               | NA   | 0               | NA   | 0               | NA   | 0               | NA   | Immunoglobulin/major histocompatibility complex  | Domain |
| IPR001909   | 218             | 8    | 0               | NA   | 0               | NA   | 0               | NA   | 0               | NA   | 0               | NA   | 0               | NA   | KRAB box                                         | Family |
| IPR001841   | 192             | 9    | 142             | 14   | 153             | 15   | 33              | 17   | 44              | 9    | 432             | 6    | 0               | NA   | Zn-finger, RING                                  | Domain |
| IPR001849   | 189             | 10   | 105             | 24   | 90              | 37   | 28              | 25   | 22              | 20   | 27              | 180  | 0               | NA   | Pleckstrin-like                                  | Domain |
| IPR000504   | 162             | 11   | 246             | 7    | 139             | 21   | 54              | 9    | 72              | 5    | 263             | 8    | 0               | NA   | RNA-binding region RNP-1 (RNA recognition motif) | Domain |
| IPR002110   | 158             | 12   | 133             | 19   | 113             | 23   | 18              | 40   | 15              | 44   | 115             | 30   | 4               | 199  | Ankyrin                                          | Repeat |
| IPR002048   | 154             | 13   | 135             | 17   | 94              | 35   | 14              | 60   | 18              | 33   | 166             | 13   | 0               | NA   | Calcium-binding EF-hand                          | Domain |
| IPR001452   | 134             | 14   | 117             | 21   | 82              | 41   | 24              | 30   | 21              | 22   | 6               | 649  | 0               | NA   | SH3 domain                                       | Domain |
| IPR003598   | 128             | 15   | 139             | 16   | 80              | 45   | 0               | NA   | 0               | NA   | 0               | NA   | 0               | NA   | Immunoglobulin C-2 type                          | Domain |
| IPR003579   | 121             | 16   | 103             | 27   | 78              | 48   | 30              | 23   | 21              | 22   | 95              | 41   | 0               | NA   | Ras small GTPase, Rab type                       | Family |
| IPR000210   | 117             | 17   | 141             | 15   | 153             | 15   | 3               | 355  | 3               | 308  | 70              | 73   | 0               | NA   | BTB/POZ domain                                   | Domain |
| IPR001440   | 112             | 18   | 106             | 23   | 64              | 59   | 33              | 17   | 38              | 11   | 146             | 18   | 12              | 55   | TPR repeat                                       | Repeat |
| IPR000561   | 112             | 18   | 113             | 22   | 144             | 19   | 2               | 501  | 0               | NA   | 11              | 419  | 0               | NA   | EGF-like domain                                  | Domain |
| IPR001356   | 109             | 20   | 134             | 18   | 103             | 30   | 9               | 98   | 2               | 450  | 94              | 43   | 0               | NA   | Homeobox                                         | Domain |
| IPR003577   | 105             | 21   | 89              | 35   | 67              | 56   | 26              | 27   | 19              | 30   | 74              | 65   | 0               | NA   | Ras small GTPase, Ras type                       | Family |
| IPR000104   | 104             | 22   | 602             | 1    | 71              | 52   | 32              | 21   | 17              | 37   | 72              | 68   | 12              | 55   | Antifreeze protein, type I                       | Family |
| IPR001478   | 103             | 23   | 97              | 30   | 82              | 41   | 2               | 501  | 1               | 763  | 15              | 315  | 6               | 129  | PDZ/DHR/GLGF domain                              | Domain |
| IPR003591   | 101             | 24   | 104             | 25   | 45              | 86   | 4               | 260  | 6               | 134  | 95              | 41   | 0               | NA   | Leucine-rich repeat, typical subtype             | Repeat |
| IPR003578   | 98              | 25   | 82              | 36   | 62              | 63   | 25              | 28   | 18              | 33   | 74              | 65   | 0               | NA   | Ras small GTPase, Rho type                       | Family |
| IPR001806   | 97              | 26   | 74              | 39   | 55              | 70   | 23              | 31   | 18              | 33   | 73              | 67   | 0               | NA   | Ras GTPase superfamily                           | Family |
| IPR000276   | 85              | 27   | 97              | 30   | 405             | 6    | 0               | NA   | 0               | NA   | 0               | NA   | 0               | NA   | Rhodopsin-like GPCR superfamily                  | Family |
| IPR003593   | 84              | 28   | 160             | 11   | 118             | 22   | 82              | 6    | 70              | 6    | 307             | 7    | 118             | 1    | AAA ATPase                                       | Domain |
| IPR000008   | 82              | 29   | 62              | 46   | 66              | 58   | 11              | 71   | 13              | 52   | 100             | 38   | 0               | NA   | C2 domain                                        | Domain |
| IPR003961   | 80              | 30   | 77              | 38   | 60              | 64   | 1               | 835  | 1               | 763  | 3               | 957  | 0               | NA   | Fibronectin, type III                            | Domain |
| IPR001650   | 79              | 31   | 101             | 28   | 94              | 35   | 76              | 8    | 66              | 8    | 146             | 18   | 18              | 30   | Helicase, C-terminal                             | Domain |
| IPR001410   | 79              | 31   | 99              | 29   | 99              | 31   | 78              | 7    | 67              | 7    | 148             | 17   | 21              | 23   | DEAD/DEAH box helicase                           | Domain |
| IPR000980   | 69              | 33   | 57              | 50   | 74              | 50   | 1               | 835  | 1               | 763  | 2               | 1172 | 0               | NA   | SH2 motif                                        | Domain |
| IPR000379   | 68              | 34   | 165             | 10   | 140             | 20   | 37              | 14   | 25              | 15   | 221             | 12   | 22              | 20   | Esterase/lipase/thioesterase, active site        | Family |
| IPR002041   | 62              | 35   | 52              | 54   | 36              | 113  | 16              | 48   | 13              | 52   | 60              | 90   | 0               | NA   | GTP-binding nuclear protein Ran                  | Family |
| IPR001965   | 62              | 35   | 54              | 52   | 41              | 96   | 15              | 53   | 19              | 30   | 86              | 49   | 0               | NA   | Zn-finger-like, PHD finger                       | Domain |
| IPR001798   | 61              | 37   | 25              | 149  | 18              | 208  | 6               | 165  | 4               | 211  | 121             | 28   | 1               | 710  | Kelch repeat                                     | Repeat |
| IPR001092   | 60              | 38   | 67              | 42   | 45              | 86   | 8               | 111  | 4               | 211  | 128             | 24   | 0               | NA   | Basic helix-loop-helix dimerization domain bHLH  | Domain |
| IPR000047   | 60              | 38   | 82              | 36   | 50              | 79   | 6               | 165  | 1               | 763  | 61              | 87   | 0               | NA   | Helix-turn-helix motif, lambda-like repressor    | Domain |
| IPR001781   | 59              | 40   | 70              | 40   | 40              | 99   | 4               | 260  | 4               | 211  | 14              | 345  | 0               | NA   | Zn-binding protein, LIM                          | Domain |

NA indicates not applicable.

**Table S4. The InterPro IDs Identified in H-Inv Proteins**

**(B) The top 40 InterPro families identified in H-Inv proteins.**

| InterPro ID | Human           |      | Fly             |      | Worm            |      | Budding yeast   |      | Fission yeast   |      | Plant           |      | Bacteria        |      | Name                                                                           |
|-------------|-----------------|------|-----------------|------|-----------------|------|-----------------|------|-----------------|------|-----------------|------|-----------------|------|--------------------------------------------------------------------------------|
|             | No. of proteins | Rank | No. of proteins | Rank | No. of proteins | Rank | No. of proteins | Rank | No. of proteins | Rank | No. of proteins | Rank | No. of proteins | Rank |                                                                                |
| IPR000719   | 271             | 1    | 379             | 3    | 544             | 2    | 118             | 1    | 110             | 2    | 1040            | 1    | 1               | 710  | Eukaryotic protein kinase                                                      |
| IPR002290   | 251             | 2    | 359             | 4    | 516             | 3    | 114             | 2    | 107             | 3    | 1008            | 2    | 0               | NA   | Serine/Threonine protein kinase                                                |
| IPR001245   | 231             | 3    | 335             | 5    | 419             | 5    | 105             | 3    | 98              | 4    | 985             | 3    | 0               | NA   | Tyrosine protein kinase                                                        |
| IPR001909   | 218             | 4    | 0               | NA   | 0               | NA   | 0               | NA   | 0               | NA   | 0               | NA   | 0               | NA   | KRAB box                                                                       |
| IPR003579   | 121             | 5    | 103             | 27   | 78              | 48   | 30              | 23   | 21              | 22   | 95              | 41   | 0               | NA   | Ras small GTPase, Rab type                                                     |
| IPR003577   | 105             | 6    | 89              | 35   | 67              | 56   | 26              | 27   | 19              | 30   | 74              | 65   | 0               | NA   | Ras small GTPase, Ras type                                                     |
| IPR000104   | 104             | 7    | 602             | 1    | 71              | 52   | 32              | 21   | 17              | 37   | 72              | 68   | 12              | 55   | Antifreeze protein, type I                                                     |
| IPR003578   | 98              | 8    | 82              | 36   | 62              | 63   | 25              | 28   | 18              | 33   | 74              | 65   | 0               | NA   | Ras small GTPase, Rho type                                                     |
| IPR001806   | 97              | 9    | 74              | 39   | 55              | 70   | 23              | 31   | 18              | 33   | 73              | 67   | 0               | NA   | Ras GTPase superfamily                                                         |
| IPR000276   | 85              | 10   | 97              | 30   | 405             | 6    | 0               | NA   | 0               | NA   | 0               | NA   | 0               | NA   | Rhodopsin-like GPCR superfamily                                                |
| IPR000379   | 68              | 11   | 165             | 10   | 140             | 20   | 37              | 14   | 25              | 15   | 221             | 12   | 22              | 20   | Esterase/lipase/thioesterase, active site                                      |
| IPR002041   | 62              | 12   | 52              | 54   | 36              | 113  | 16              | 48   | 13              | 52   | 60              | 90   | 0               | NA   | GTP-binding nuclear protein Ran                                                |
| IPR001254   | 52              | 13   | 247             | 6    | 11              | 314  | 0               | NA   | 1               | 763  | 13              | 365  | 4               | 199  | Serine protease, trypsin family                                                |
| IPR000387   | 51              | 14   | 59              | 49   | 110             | 25   | 10              | 80   | 8               | 91   | 18              | 254  | 1               | 710  | Tyrosine specific protein phosphatase and dual specificity protein phosphatase |
| IPR001314   | 47              | 15   | 236             | 8    | 9               | 377  | 0               | NA   | 0               | NA   | 8               | 537  | 2               | 411  | Chymotrypsin serine protease, family S1                                        |
| IPR001993   | 45              | 16   | 69              | 41   | 38              | 106  | 34              | 16   | 23              | 19   | 60              | 90   | 0               | NA   | Mitochondrial substrate carrier                                                |
| IPR001394   | 45              | 16   | 32              | 106  | 33              | 122  | 18              | 40   | 16              | 41   | 32              | 158  | 0               | NA   | Ubiquitin thiolesterase, family 2                                              |
| IPR002198   | 40              | 18   | 62              | 46   | 79              | 46   | 13              | 64   | 20              | 27   | 90              | 47   | 18              | 30   | Short-chain dehydrogenase/reductase SDR                                        |
| IPR003959   | 36              | 19   | 50              | 57   | 40              | 99   | 33              | 17   | 31              | 12   | 110             | 31   | 9               | 78   | AAA ATPase, central region                                                     |
| IPR002347   | 35              | 20   | 47              | 62   | 58              | 67   | 9               | 98   | 12              | 62   | 70              | 73   | 16              | 36   | Glucose/ribitol dehydrogenase                                                  |
| IPR000251   | 35              | 20   | 34              | 95   | 20              | 190  | 8               | 111  | 4               | 211  | 42              | 118  | 0               | NA   | ADP-ribosylation factor family                                                 |
| IPR000910   | 34              | 22   | 33              | 101  | 18              | 208  | 7               | 132  | 8               | 91   | 16              | 294  | 0               | NA   | HMG1/2 (high mobility group) box                                               |
| IPR005821   | 33              | 23   | 63              | 44   | 109             | 26   | 3               | 355  | 1               | 763  | 30              | 165  | 1               | 710  | Ion transport protein                                                          |
| IPR001664   | 33              | 23   | 3               | 880  | 15              | 248  | 0               | NA   | 0               | NA   | 0               | NA   | 0               | NA   | Intermediate filament protein                                                  |
| IPR005828   | 29              | 25   | 131             | 20   | 88              | 38   | 50              | 11   | 39              | 10   | 94              | 43   | 47              | 4    | General substrate transporter                                                  |
| IPR000301   | 28              | 26   | 51              | 56   | 21              | 183  | 0               | NA   | 0               | NA   | 7               | 587  | 0               | NA   | CD9/CD37/CD63 antigen                                                          |
| IPR005834   | 27              | 27   | 50              | 57   | 43              | 90   | 27              | 26   | 22              | 20   | 72              | 68   | 22              | 20   | haloacid dehalogenase-like hydrolase                                           |
| IPR001164   | 27              | 27   | 15              | 238  | 9               | 377  | 6               | 165  | 6               | 134  | 17              | 272  | 0               | NA   | Human Rev interacting-like protein (hRIP)                                      |
| IPR000832   | 27              | 27   | 32              | 106  | 12              | 296  | 0               | NA   | 0               | NA   | 1               | 1476 | 0               | NA   | G-protein coupled receptors family 2 (secretin-like)                           |
| IPR004000   | 26              | 30   | 17              | 217  | 13              | 278  | 10              | 80   | 10              | 71   | 18              | 254  | 0               | NA   | Actin/actin-like                                                               |
| IPR001878   | 26              | 30   | 21              | 171  | 33              | 122  | 11              | 71   | 7               | 109  | 158             | 14   | 0               | NA   | Zn-finger, CCHC type                                                           |
| IPR001723   | 25              | 32   | 36              | 90   | 34              | 117  | 0               | NA   | 0               | NA   | 0               | NA   | 0               | NA   | Steroid hormone receptor                                                       |
| IPR003008   | 24              | 33   | 14              | 265  | 17              | 225  | 4               | 260  | 4               | 211  | 20              | 234  | 1               | 710  | Tubulin/FtsZ protein                                                           |
| IPR002190   | 24              | 33   | 0               | NA   | 0               | NA   | 0               | NA   | 0               | NA   | 0               | NA   | 0               | NA   | MAGE protein                                                                   |
| IPR002046   | 24              | 33   | 24              | 155  | 13              | 278  | 7               | 132  | 4               | 211  | 25              | 191  | 0               | NA   | GTP-binding protein SAR1                                                       |
| IPR005820   | 23              | 36   | 28              | 122  | 43              | 90   | 1               | 835  | 1               | 763  | 8               | 537  | 0               | NA   | Cation channel, non-ligand gated                                               |
| IPR002286   | 23              | 36   | 2               | 1080 | 0               | NA   | 0               | NA   | 0               | NA   | 0               | NA   | 0               | NA   | P2 purinoceptor                                                                |
| IPR001128   | 23              | 36   | 92              | 34   | 79              | 46   | 3               | 355  | 2               | 450  | 238             | 10   | 0               | NA   | Cytochrome P450                                                                |
| IPR004031   | 22              | 39   | 1               | 1405 | 0               | NA   | 0               | NA   | 0               | NA   | 0               | NA   | 0               | NA   | PMP-22/EMP/MP20 and claudin family                                             |
| IPR001811   | 22              | 39   | 0               | NA   | 0               | NA   | 0               | NA   | 0               | NA   | 0               | NA   | 0               | NA   | Small chemokine, interleukin-8 like                                            |

NA indicates not applicable.

**Table S4. The InterPro IDs Identified in H-Inv Proteins**

**(C) The top 40 InterPro domains found in H-Inv proteins.**

| InterPro ID | Human           |      | Fly             |      | Worm            |      | Budding yeast   |      | Fission yeast   |      | Plant           |      | Bacteria        |      | Name                                             |
|-------------|-----------------|------|-----------------|------|-----------------|------|-----------------|------|-----------------|------|-----------------|------|-----------------|------|--------------------------------------------------|
|             | No. of proteins | Rank | No. of proteins | Rank | No. of proteins | Rank | No. of proteins | Rank | No. of proteins | Rank | No. of proteins | Rank | No. of proteins | Rank |                                                  |
| IPR000822   | 549             | 1    | 393             | 2    | 184             | 13   | 47              | 13   | 25              | 15   | 139             | 21   | 0               | NA   | Zn-finger, C2H2 type                             |
| IPR003599   | 229             | 2    | 148             | 12   | 82              | 41   | 0               | NA   | 0               | NA   | 0               | NA   | 0               | NA   | Immunoglobulin subtype                           |
| IPR003006   | 220             | 3    | 146             | 13   | 83              | 40   | 0               | NA   | 0               | NA   | 0               | NA   | 0               | NA   | Immunoglobulin/major histocompatibility complex  |
| IPR001841   | 192             | 4    | 142             | 14   | 153             | 15   | 33              | 17   | 44              | 9    | 432             | 6    | 0               | NA   | Zn-finger, RING                                  |
| IPR001849   | 189             | 5    | 105             | 24   | 90              | 37   | 28              | 25   | 22              | 20   | 27              | 180  | 0               | NA   | Pleckstrin-like                                  |
| IPR000504   | 162             | 6    | 246             | 7    | 139             | 21   | 54              | 9    | 72              | 5    | 263             | 8    | 0               | NA   | RNA-binding region RNP-1 (RNA recognition motif) |
| IPR002048   | 154             | 7    | 135             | 17   | 94              | 35   | 14              | 60   | 18              | 33   | 166             | 13   | 0               | NA   | Calcium-binding EF-hand                          |
| IPR001452   | 134             | 8    | 117             | 21   | 82              | 41   | 24              | 30   | 21              | 22   | 6               | 649  | 0               | NA   | SH3 domain                                       |
| IPR003598   | 128             | 9    | 139             | 16   | 80              | 45   | 0               | NA   | 0               | NA   | 0               | NA   | 0               | NA   | Immunoglobulin C-2 type                          |
| IPR000210   | 117             | 10   | 141             | 15   | 153             | 15   | 3               | 355  | 3               | 308  | 70              | 73   | 0               | NA   | BTB/POZ domain                                   |
| IPR000561   | 112             | 11   | 113             | 22   | 144             | 19   | 2               | 501  | 0               | NA   | 11              | 419  | 0               | NA   | EGF-like domain                                  |
| IPR001356   | 109             | 12   | 134             | 18   | 103             | 30   | 9               | 98   | 2               | 450  | 94              | 43   | 0               | NA   | Homeobox                                         |
| IPR001478   | 103             | 13   | 97              | 30   | 82              | 41   | 2               | 501  | 1               | 763  | 15              | 315  | 6               | 129  | PDZ/DHR/GLGF domain                              |
| IPR003593   | 84              | 14   | 160             | 11   | 118             | 22   | 82              | 6    | 70              | 6    | 307             | 7    | 118             | 1    | AAA ATPase                                       |
| IPR000008   | 82              | 15   | 62              | 46   | 66              | 58   | 11              | 71   | 13              | 52   | 100             | 38   | 0               | NA   | C2 domain                                        |
| IPR003961   | 80              | 16   | 77              | 38   | 60              | 64   | 1               | 835  | 1               | 763  | 3               | 957  | 0               | NA   | Fibronectin, type III                            |
| IPR001650   | 79              | 17   | 101             | 28   | 94              | 35   | 76              | 8    | 66              | 8    | 146             | 18   | 18              | 30   | Helicase, C-terminal                             |
| IPR001410   | 79              | 17   | 99              | 29   | 99              | 31   | 78              | 7    | 67              | 7    | 148             | 17   | 21              | 23   | DEAD/DEAH box helicase                           |
| IPR000980   | 69              | 19   | 57              | 50   | 74              | 50   | 1               | 835  | 1               | 763  | 2               | 1172 | 0               | NA   | SH2 motif                                        |
| IPR001965   | 62              | 20   | 54              | 52   | 41              | 96   | 15              | 53   | 19              | 30   | 86              | 49   | 0               | NA   | Zn-finger-like, PHD finger                       |
| IPR001092   | 60              | 21   | 67              | 42   | 45              | 86   | 8               | 111  | 4               | 211  | 128             | 24   | 0               | NA   | Basic helix-loop-helix dimerization domain bHLH  |
| IPR000047   | 60              | 21   | 82              | 36   | 50              | 79   | 6               | 165  | 1               | 763  | 61              | 87   | 0               | NA   | Helix-turn-helix motif, lambda-like repressor    |
| IPR001781   | 59              | 23   | 70              | 40   | 40              | 99   | 4               | 260  | 4               | 211  | 14              | 345  | 0               | NA   | Zn-binding protein, LIM                          |
| IPR000637   | 58              | 24   | 53              | 53   | 31              | 134  | 7               | 132  | 6               | 134  | 63              | 83   | 1               | 710  | HMG-I and HMG-Y DNA-binding domain (A+T-hook)    |
| IPR001881   | 56              | 25   | 45              | 70   | 40              | 99   | 0               | NA   | 0               | NA   | 17              | 272  | 0               | NA   | EGF-like calcium-binding                         |
| IPR001660   | 56              | 25   | 40              | 81   | 23              | 170  | 4               | 260  | 4               | 211  | 9               | 486  | 0               | NA   | Sterile alpha motif SAM                          |
| IPR003877   | 55              | 27   | 25              | 149  | 14              | 256  | 4               | 260  | 3               | 308  | 7               | 587  | 0               | NA   | SPla/RYanodine receptor SPRY                     |
| IPR003596   | 55              | 27   | 13              | 281  | 3               | 786  | 0               | NA   | 0               | NA   | 0               | NA   | 0               | NA   | Immunoglobulin V-type                            |
| IPR000483   | 53              | 29   | 35              | 91   | 9               | 377  | 0               | NA   | 0               | NA   | 0               | NA   | 0               | NA   | Cysteine-rich flanking region, C-terminal        |
| IPR000198   | 51              | 30   | 24              | 155  | 25              | 156  | 11              | 71   | 10              | 71   | 10              | 443  | 0               | NA   | RhoGAP domain                                    |
| IPR000219   | 50              | 31   | 46              | 64   | 27              | 149  | 6               | 165  | 8               | 91   | 0               | NA   | 0               | NA   | Dbl domain (dbl/cdc24 rhoGEF family)             |
| IPR001810   | 49              | 32   | 46              | 64   | 433             | 4    | 14              | 60   | 13              | 52   | 650             | 4    | 0               | NA   | Cyclin-like F-box                                |
| IPR001870   | 48              | 33   | 13              | 281  | 2               | 968  | 0               | NA   | 0               | NA   | 0               | NA   | 0               | NA   | Gamma-carboxylase-like                           |
| IPR004822   | 47              | 34   | 30              | 112  | 88              | 38   | 17              | 45   | 20              | 27   | 77              | 59   | 0               | NA   | Histone-fold/TFIID-TAF/NF-Y domain               |
| IPR000315   | 47              | 34   | 11              | 329  | 20              | 190  | 0               | NA   | 0               | NA   | 32              | 158  | 0               | NA   | Zn-finger, B-box                                 |
| IPR003309   | 45              | 36   | 0               | NA   | 0               | NA   | 0               | NA   | 0               | NA   | 0               | NA   | 0               | NA   | Transcriptional regulator SCAN                   |
| IPR000048   | 45              | 36   | 60              | 48   | 24              | 161  | 4               | 260  | 6               | 134  | 79              | 57   | 0               | NA   | IQ calmodulin-binding region                     |
| IPR000626   | 44              | 38   | 28              | 122  | 34              | 117  | 13              | 64   | 18              | 33   | 87              | 48   | 0               | NA   | Ubiquitin domain                                 |
| IPR000051   | 43              | 39   | 46              | 64   | 53              | 74   | 21              | 34   | 31              | 12   | 107             | 33   | 29              | 12   | SAM (and some other nucleotide) binding motif    |
| IPR002035   | 41              | 40   | 11              | 329  | 55              | 70   | 3               | 355  | 3               | 308  | 23              | 207  | 4               | 199  | Von Willebrand factor, type A                    |

NA indicates not applicable.

**Table S4. The InterPro IDs Identified in H-Inv Proteins**

**(D) The top 40 InterPro repeats found in H-Inv proteins.**

| InterPro ID | Human           |      | Fly             |      | Worm            |      | Budding yeast   |      | Fission yeast   |      | Plant           |      | Bacteria        |      | Name                                                    |
|-------------|-----------------|------|-----------------|------|-----------------|------|-----------------|------|-----------------|------|-----------------|------|-----------------|------|---------------------------------------------------------|
|             | No. of proteins | Rank | No. of proteins | Rank | No. of proteins | Rank | No. of proteins | Rank | No. of proteins | Rank | No. of proteins | Rank | No. of proteins | Rank |                                                         |
| IPR001680   | 223             | 1    | 223             | 9    | 151             | 17   | 98              | 4    | 116             | 1    | 236             | 11   | 0               | NA   | G-protein beta WD-40 repeat                             |
| IPR002110   | 158             | 2    | 133             | 19   | 113             | 23   | 18              | 40   | 15              | 44   | 115             | 30   | 4               | 199  | Ankyrin                                                 |
| IPR001440   | 112             | 3    | 106             | 23   | 64              | 59   | 33              | 17   | 38              | 11   | 146             | 18   | 12              | 55   | TPR repeat                                              |
| IPR003591   | 101             | 4    | 104             | 25   | 45              | 86   | 4               | 260  | 6               | 134  | 95              | 41   | 0               | NA   | Leucine-rich repeat, typical subtype                    |
| IPR001798   | 61              | 5    | 25              | 149  | 18              | 208  | 6               | 165  | 4               | 211  | 121             | 28   | 1               | 710  | Kelch repeat                                            |
| IPR003962   | 40              | 6    | 42              | 75   | 27              | 149  | 0               | NA   | 0               | NA   | 0               | NA   | 0               | NA   | Fibronectin, type III repeat                            |
| IPR000087   | 36              | 7    | 27              | 131  | 181             | 14   | 0               | NA   | 0               | NA   | 8               | 537  | 0               | NA   | Collagen triple helix repeat                            |
| IPR000225   | 34              | 8    | 23              | 163  | 11              | 314  | 2               | 501  | 6               | 134  | 78              | 58   | 0               | NA   | Armadillo repeat                                        |
| IPR002017   | 33              | 9    | 37              | 87   | 16              | 237  | 2               | 501  | 1               | 763  | 3               | 957  | 2               | 411  | Spectrin repeat                                         |
| IPR000884   | 33              | 9    | 20              | 178  | 42              | 94   | 0               | NA   | 0               | NA   | 0               | NA   | 0               | NA   | Thrombospondin, type I                                  |
| IPR003885   | 19              | 11   | 28              | 122  | 10              | 342  | 1               | 835  | 2               | 450  | 17              | 272  | 0               | NA   | Leucine-rich repeat, cysteine-containing type           |
| IPR003590   | 19              | 11   | 18              | 198  | 5               | 586  | 1               | 835  | 1               | 763  | 7               | 587  | 0               | NA   | Leucine rich repeat, ribonuclease inhibitor type        |
| IPR002165   | 15              | 13   | 9               | 398  | 5               | 586  | 0               | NA   | 0               | NA   | 0               | NA   | 0               | NA   | Plexin                                                  |
| IPR000357   | 15              | 13   | 11              | 329  | 14              | 256  | 10              | 80   | 7               | 109  | 17              | 272  | 0               | NA   | HEAT repeat                                             |
| IPR004092   | 9               | 15   | 5               | 627  | 2               | 968  | 0               | NA   | 0               | NA   | 0               | NA   | 0               | NA   | Mbt repeat                                              |
| IPR003107   | 8               | 16   | 10              | 362  | 7               | 451  | 8               | 111  | 8               | 91   | 14              | 345  | 0               | NA   | RNA-processing protein, HAT helix                       |
| IPR001610   | 8               | 16   | 8               | 437  | 1               | 1251 | 0               | NA   | 2               | 450  | 7               | 587  | 3               | 276  | PAC motif                                               |
| IPR001258   | 8               | 16   | 11              | 329  | 11              | 314  | 0               | NA   | 0               | NA   | 6               | 649  | 0               | NA   | NHL repeat                                              |
| IPR004018   | 7               | 19   | 4               | 735  | 1               | 1251 | 0               | NA   | 0               | NA   | 0               | NA   | 0               | NA   | RPEL repeat                                             |
| IPR003409   | 7               | 19   | 10              | 362  | 1               | 1251 | 0               | NA   | 0               | NA   | 15              | 315  | 0               | NA   | MORN motif                                              |
| IPR001298   | 7               | 19   | 12              | 304  | 8               | 415  | 0               | NA   | 0               | NA   | 2               | 1172 | 0               | NA   | Filamin/ABP280 repeat                                   |
| IPR002860   | 6               | 22   | 0               | NA   | 0               | NA   | 7               | 132  | 1               | 763  | 2               | 1172 | 0               | NA   | Glycosyl hydrolase, BNR repeat                          |
| IPR000557   | 6               | 22   | 0               | NA   | 6               | 505  | 0               | NA   | 0               | NA   | 0               | NA   | 0               | NA   | Calponin repeat                                         |
| IPR000033   | 6               | 22   | 8               | 437  | 8               | 415  | 0               | NA   | 0               | NA   | 1               | 1476 | 0               | NA   | Low-density lipoprotein receptor, YWTD repeat           |
| IPR001451   | 5               | 25   | 7               | 488  | 6               | 505  | 4               | 260  | 5               | 176  | 24              | 199  | 15              | 41   | Bacterial transferase hexapeptide repeat                |
| IPR000861   | 5               | 25   | 4               | 735  | 1               | 1251 | 1               | 835  | 3               | 308  | 0               | NA   | 0               | NA   | PKN/rhopilin/rhotekin rho-binding repeat                |
| IPR002885   | 4               | 27   | 5               | 627  | 1               | 1251 | 2               | 501  | 4               | 211  | 459             | 5    | 0               | NA   | PPR repeat                                              |
| IPR002151   | 4               | 27   | 1               | 1405 | 3               | 786  | 0               | NA   | 0               | NA   | 0               | NA   | 0               | NA   | Kinesin light chain                                     |
| IPR001370   | 4               | 27   | 6               | 546  | 2               | 968  | 1               | 835  | 1               | 763  | 0               | NA   | 0               | NA   | Baculovirus inhibitor of apoptosis protein repeat (BIR) |
| IPR004212   | 3               | 30   | 0               | NA   | 0               | NA   | 0               | NA   | 0               | NA   | 0               | NA   | 0               | NA   | GTF2I-like repeat                                       |
| IPR004155   | 3               | 30   | 1               | 1405 | 1               | 1251 | 1               | 835  | 1               | 763  | 3               | 957  | 1               | 710  | PBS lyase HEAT-like repeat                              |
| IPR003267   | 3               | 30   | 3               | 880  | 5               | 586  | 0               | NA   | 0               | NA   | 2               | 1172 | 0               | NA   | Small proline-rich                                      |
| IPR002088   | 3               | 30   | 3               | 880  | 2               | 968  | 2               | 501  | 2               | 450  | 3               | 957  | 0               | NA   | Protein prenyltransferase, alpha subunit                |
| IPR002015   | 3               | 30   | 3               | 880  | 4               | 668  | 3               | 355  | 3               | 308  | 5               | 728  | 0               | NA   | Proteasome/cyclosome, regulatory subunit                |
| IPR000547   | 3               | 30   | 3               | 880  | 4               | 668  | 5               | 198  | 3               | 308  | 6               | 649  | 0               | NA   | 7-Fold repeat in clathrin and VPS proteins              |
| IPR004153   | 2               | 36   | 1               | 1405 | 1               | 1251 | 0               | NA   | 0               | NA   | 0               | NA   | 0               | NA   | CXCXC repeat                                            |
| IPR003822   | 2               | 36   | 4               | 735  | 1               | 1251 | 1               | 835  | 3               | 308  | 23              | 207  | 0               | NA   | Paired amphipathic helix                                |
| IPR003134   | 2               | 36   | 1               | 1405 | 0               | NA   | 0               | NA   | 0               | NA   | 0               | NA   | 0               | NA   | Hs1/Cortactin                                           |
| IPR001330   | 2               | 36   | 3               | 880  | 4               | 668  | 4               | 260  | 4               | 211  | 18              | 254  | 0               | NA   | Prenyltransferase/squalene oxidase                      |
| IPR001101   | 2               | 36   | 4               | 735  | 1               | 1251 | 0               | NA   | 0               | NA   | 0               | NA   | 0               | NA   | Plectin repeat                                          |

NA indicates not applicable.
