# Supplementary material for: Integrative Annotation of 21,037 Human Genes Validated by Full-Length cDNA Clones
Source: PubMed Central journal article supplement (PMC393292; doi:10.1371/journal.pbio.0020162), 2004-04-20
Supplement: pbio.0020162.st008.pdf [file pbio.0020162.st008.pdf]

**Table S8. Basic Statistics for UTR Sequences Analyzed**

|                            | 5' UTR                       |             |                              | 3' UTR                       |             |                              |
|----------------------------|------------------------------|-------------|------------------------------|------------------------------|-------------|------------------------------|
|                            | Number of sequences analysed | Mean length | Standard deviation of length | Number of sequences analysed | Mean length | Standard deviation of length |
| <i>Homo sapiens</i>        | 15,271                       | 349.33      | 506.29                       | 28,562                       | 925.11      | 850.65                       |
| <i>Pan troglodytes</i>     | 116                          | 101.34      | 81.6                         | 75                           | 192.52      | 130.52                       |
| <i>Macaca fascicularis</i> | 367                          | 328.91      | 376.72                       | 379                          | 698.86      | 634.68                       |
| <i>Macaca mulatta</i>      | 27                           | 71.19       | 98.36                        | 38                           | 143.74      | 195.28                       |
| <i>Mus musculus</i>        | 7,368                        | 179.75      | 266.82                       | 7,914                        | 711.07      | 672.9                        |
| <i>Rattus norvegicus</i>   | 949                          | 158.08      | 232.57                       | 1,039                        | 543.67      | 560.68                       |
