# Supplementary material for: Integrative Annotation of 21,037 Human Genes Validated by Full-Length cDNA Clones
Source: PubMed Central journal article supplement (PMC393292; doi:10.1371/journal.pbio.0020162), 2004-04-20
Supplement: pbio.0020162.st010.pdf [file pbio.0020162.st010.pdf]

**Table S10. List of the Databases and Software used in the H-Inv Project**

|                          | Database/Software                    | URL                                                                                                         | Description                                                                                                                                                                            |
|--------------------------|--------------------------------------|-------------------------------------------------------------------------------------------------------------|----------------------------------------------------------------------------------------------------------------------------------------------------------------------------------------|
| <b>DNA sequences</b>     |                                      |                                                                                                             |                                                                                                                                                                                        |
|                          | DDBJ                                 | <a href="http://www.ddbj.nig.ac.jp/Welcome.html">http://www.ddbj.nig.ac.jp/Welcome.html</a>                 | DNA sequence databases, reference data set is available on 15th July 2002                                                                                                              |
|                          | EMBL                                 | <a href="http://www.embl-heidelberg.de/">http://www.embl-heidelberg.de/</a>                                 |                                                                                                                                                                                        |
|                          | GenBank                              | <a href="http://www.ncbi.nlm.nih.gov/Genbank/index.html">http://www.ncbi.nlm.nih.gov/Genbank/index.html</a> |                                                                                                                                                                                        |
| <b>Human genome</b>      |                                      |                                                                                                             |                                                                                                                                                                                        |
|                          | NCBI                                 | <a href="http://www.ncbi.nlm.nih.gov/">http://www.ncbi.nlm.nih.gov/</a>                                     | Human genome build 34                                                                                                                                                                  |
|                          | UCSC                                 | <a href="http://genome.ucsc.edu/">http://genome.ucsc.edu/</a>                                               | Genome Bioinformatics Site                                                                                                                                                             |
| <b>Protein sequences</b> |                                      |                                                                                                             |                                                                                                                                                                                        |
|                          | UniProt/SWISS-PROT/TrEMBL/TrEMBL_new | <a href="http://www.ebi.ac.uk/swissprot/">http://www.ebi.ac.uk/swissprot/</a>                               | non-redundant protein dataset built from SWISS-PROT, TrEMBL, and TrEMBL_new constructed for H-Invitational                                                                             |
|                          | RefSeq                               | <a href="http://www.ncbi.nlm.nih.gov/RefSeq/">http://www.ncbi.nlm.nih.gov/RefSeq/</a>                       | A collection aims to provide a comprehensive, integrated, non-redundant set of sequences, including genomic DNA, transcript (RNA), and protein products, for major research organisms. |

## Domain, motifs, families and post translational modification(PTM).

InterProScan <http://www.ebi.ac.uk/interpro/scan.html>

An integrated documentation resource for protein families, domains and sites.

## Subcellular localisation

PSORT II <http://psort.nibb.ac.jp/>

A computer program for the prediction of protein localization sites in cells.

SOSUI <http://sosui.proteome.bio.tuat.ac.jp/sosuiframe0.html>

A computer program for classification and secondary structure prediction of

HMMER <http://hmmer.wustl.edu/>

Membrane proteins  
A computer program for biological sequence analysis using profile hidden markov model

TargetP <http://www.cbs.dtu.dk/services/TargetP/>

A program for prediction of the subcellular location of eukaryotic protein sequences

## 3-D structure

GTOP <http://spock.genes.nig.ac.jp/~genome/gtop.html>

A database consisting of data analyses of proteins identified by various genome projects. This database mainly uses sequence homology analyses and features extensive utilization of information on three-dimensional structures.

|                |            |                                                                                               |                                                                                                                                                                                                                                                                   |
|----------------|------------|-----------------------------------------------------------------------------------------------|-------------------------------------------------------------------------------------------------------------------------------------------------------------------------------------------------------------------------------------------------------------------|
|                | 3D keynote | In preparation                                                                                | Prediction of functions out of amino acid sequences based on module structure of proteins.                                                                                                                                                                        |
| <b>Pathway</b> | KEGG       | <a href="http://kegg.genome.ad.jp/">http://kegg.genome.ad.jp/</a>                             | A suite of databases and associated software, integrating our current knowledge on molecular interaction networks in biological processes                                                                                                                         |
| <b>Disease</b> | OMIM       | <a href="http://www.ncbi.nlm.nih.gov/omim/">http://www.ncbi.nlm.nih.gov/omim/</a>             | OMIM, Online Mendelian Inheritance in Man, is a database of catalog for human genes and genetic disorders                                                                                                                                                         |
|                | GenAtlas   | <a href="http://www.dsi.univ-paris5.fr/genatlas/">http://www.dsi.univ-paris5.fr/genatlas/</a> | The GENATLAS database compiles the information relevant to the mapping efforts of the Human Genome Project. This information is collected from original articles in the literature or from the proceedings of Human Gene Mapping and Single Chromosome Workshops. |

## Expression

iAFLP

<http://bodymap.ims.u-tokyo.ac.jp/>

[http://www.ncbi.nlm.nih.gov/entrez/query.fcgi?cmd=Retrieve&db=PubMed&list\\_uids=10613853&dopt=Abstract](http://www.ncbi.nlm.nih.gov/entrez/query.fcgi?cmd=Retrieve&db=PubMed&list_uids=10613853&dopt=Abstract)

[http://www.ncbi.nlm.nih.gov/entrez/query.fcgi?cmd=Retrieve&db=PubMed&list\\_uids=11125076&dopt=Abstract](http://www.ncbi.nlm.nih.gov/entrez/query.fcgi?cmd=Retrieve&db=PubMed&list_uids=11125076&dopt=Abstract)

Long Oligomer DNA-Chip

Watanabe, S. *et al.* *in Press*

HugelIndex - Affymetrix

[http://www.ncbi.nlm.nih.gov/entrez/query.fcgi?cmd=Retrieve&db=PubMed&list\\_uids=11752297&dopt=Abstract](http://www.ncbi.nlm.nih.gov/entrez/query.fcgi?cmd=Retrieve&db=PubMed&list_uids=11752297&dopt=Abstract)

<http://zlab.bu.edu/HugelIndex/index.htm>

TissueDB - Affymetrix

<http://www2.genome.rcast.u-tokyo.ac.jp/tp/>

Nylon membrane Microarray

[http://www.ncbi.nlm.nih.gov/entrez/query.fcgi?cmd=Retrieve&db=PubMed&list\\_uids=10022985&dopt=Abstract](http://www.ncbi.nlm.nih.gov/entrez/query.fcgi?cmd=Retrieve&db=PubMed&list_uids=10022985&dopt=Abstract)

SAGE

[http://www.ncbi.nlm.nih.gov/entrez/query.fcgi?cmd=Retrieve&db=PubMed&list\\_uids=7570003&dopt=Abstract](http://www.ncbi.nlm.nih.gov/entrez/query.fcgi?cmd=Retrieve&db=PubMed&list_uids=7570003&dopt=Abstract)

[http://www.ncbi.nlm.nih.gov/entrez/query.fcgi?cmd=Retrieve&db=PubMed&list\\_uids=12119410&dopt=Abstract](http://www.ncbi.nlm.nih.gov/entrez/query.fcgi?cmd=Retrieve&db=PubMed&list_uids=12119410&dopt=Abstract)

dbEST

[http://www.ncbi.nlm.nih.gov/entrez/query.fcgi?cmd=Retrieve&db=PubMed&list\\_uids=8401577&dopt=Abstract](http://www.ncbi.nlm.nih.gov/entrez/query.fcgi?cmd=Retrieve&db=PubMed&list_uids=8401577&dopt=Abstract)

<http://www.ncbi.nlm.nih.gov/dbEST/index.html>

BodyMap

[http://www.ncbi.nlm.nih.gov/entrez/query.fcgi?cmd=Retrieve&db=PubMed&list\\_uids=1345164&dopt=Abstract](http://www.ncbi.nlm.nih.gov/entrez/query.fcgi?cmd=Retrieve&db=PubMed&list_uids=1345164&dopt=Abstract)

[http://www.ncbi.nlm.nih.gov/entrez/query.fcgi?cmd=Retrieve&db=PubMed&list\\_uids=11076866&dopt=Abstract](http://www.ncbi.nlm.nih.gov/entrez/query.fcgi?cmd=Retrieve&db=PubMed&list_uids=11076866&dopt=Abstract)

## Literatures

Gene ontology

<http://www.geneontology.org/>

A project to produce a dynamic controlled vocabulary that can be applied to all organisms even as knowledge of gene and protein roles in cells is accumulating and changing.

## SNPs

dbSNP

<http://www.ncbi.nlm.nih.gov/entrez/query.fcgi?db=Snp>

A database for collection of single nucleotide polymorphism

## Sequence analysis

NCBI-BLASTX 2.0.11

<http://www.ncbi.nlm.nih.gov/BLAST/>

NCBI-BLASTN 2.2.2

<http://www.ncbi.nlm.nih.gov/BLAST/>

FASTY 3.4t11

<http://fasta.bioch.virginia.edu/fasta/home.html>

Repeat masker

<http://www.genome.washington.edu/UWGC/>

GeneMark

<http://opal.biology.gatech.edu/GeneMark/>

Compare DNA sequence to protein  
Compare DNA sequences  
Compare DNA sequence to protein  
Mask repeat and low complexity region in sequence  
Gene prediction program which has been designed to predict prokaryotic genes

## Protein sequence characterization

InterProScan

PSORT II

SOSUI

HMMER

TargetP

GTOP

## Sequence alignment

ClustalW

<http://crick.genes.nig.ac.jp/homology/clustalw.shtml>

A program to make  
multiple sequence  
alignment for DNA or  
proteins

---
