# Supplementary material for: Integrative Annotation of 21,037 Human Genes Validated by Full-Length cDNA Clones
Source: PLoS Biol. 2004 Apr 20;2(6):e162. doi: 10.1371/journal.pbio.0020162 (PMC393292; doi:10.1371/journal.pbio.0020162)
Supplement: Table S2 — (A) CAI was measured for all H-Inv proteins. CAI is a measure of biased patterns for synonymous codon usage (http://biobase.dk/embossdocs/cai.html). (B) Codon usage in predicted ORFs of H-Inv proteins. Total tri-nucleotide frequencies (forward strand) for the sequences of each species are shown. Nonredundant proteome datasets for nonhuman species were obtained from the following sites: fly (Drosophila melanogaster; http://flybase.bio.indiana.edu/), worm (Caenorhabditis elegans; http://www.wormbase.org/), budding yeast (Saccharomyces cerevisiae; http://www.pasteur.fr/externe), fission yeast (Schizosaccharomyces pombe; http://www.sanger.ac.uk/), plant (Arabidopsis thaliana; http://mips.gsf.de/proj/thal/index.html), and bacteria (Escherichia coli K12; ftp://ftp.ncbi.nih.gov/genbank/genomes/Bacteria/Escherichia_coli_K12/). (20 KB PDF). [file pbio.0020162.st002.pdf]

## Table S2. CAI and Codon Usage

### (A) CAI was measured for all H-Inv proteins.

CAI is a measure of biased patterns for synonymous codon usage (<http://biobase.dk/embosdocs/cai.html>).

#### Distribution in similarity categories.

|                       | Median | Mean  | Min   | Max   | Number of ORFs |
|-----------------------|--------|-------|-------|-------|----------------|
| Category I proteins   | 0.783  | 0.780 | 0.648 | 0.923 | 5,074          |
| Category II proteins  | 0.770  | 0.770 | 0.604 | 0.918 | 4,104          |
| Category III proteins | 0.770  | 0.769 | 0.638 | 0.954 | 2,531          |
| Category IV proteins  | 0.760  | 0.760 | 0.610 | 0.900 | 1,706          |
| Category V proteins   | 0.741  | 0.742 | 0.586 | 0.933 | 6,159          |
| Total                 | 0.761  | 0.763 | 0.586 | 0.954 | 19,574         |

#### Distribution in 10 tissue classes for genes showing tissue-specific expression.

| Tissues               | Median | Mean  | Min   | Max   | Number of ORFs |
|-----------------------|--------|-------|-------|-------|----------------|
| Neural                | 0.791  | 0.792 | 0.693 | 0.887 | 61             |
| Blood/spleen/LND      | 0.795  | 0.786 | 0.652 | 0.954 | 261            |
| Dermal-connective     | 0.791  | 0.782 | 0.682 | 0.871 | 93             |
| Placenta/testis/ovary | 0.782  | 0.785 | 0.690 | 0.887 | 46             |
| Muscle/heart          | 0.776  | 0.771 | 0.650 | 0.864 | 135            |
| Stomach/colon         | 0.789  | 0.789 | 0.648 | 0.896 | 110            |
| Liver                 | 0.790  | 0.784 | 0.709 | 0.846 | 32             |
| Lung                  | 0.781  | 0.781 | 0.683 | 0.848 | 97             |
| Kidney/bladder        | 0.767  | 0.762 | 0.624 | 0.857 | 17             |
| Endocrine-exocrine    | 0.783  | 0.778 | 0.663 | 0.849 | 84             |
| Total                 | 0.788  | 0.782 | 0.624 | 0.954 | 936            |

Table S2. CAI and Codon Usage

(B) Codon usage in predicted ORFs of H-Inv proteins.

Total tri-nucleotide frequencies (forward strand) for the sequences of each species are shown. Nonredundant proteome datasets for nonhuman species were obtained from the following sites: fly (*Drosophila melanogaster* ; <http://flybase.bio.indiana.edu/>), worm (*Caenorhabditis elegans* ; <http://www.wormbase.org/>), budding yeast (*Saccharomyces cerevisiae* ; <http://www.pasteur.fr/externe/>), fission yeast (*Schizosaccharomyces pombe* ; <http://www.sanger.ac.uk/>), plant (*Arabidopsis thaliana* ; <http://mips.gsf.de/proj/thal/index.html>), and bacteria (*Escherichia coli* K12; [ftp://ftp.ncbi.nih.gov/genbank/genomes/Bacteria/Escherichia\\_coli\\_K12/](ftp://ftp.ncbi.nih.gov/genbank/genomes/Bacteria/Escherichia_coli_K12/)).

| Total tri-nucleotide frequencies (forward strand) for the sequences of each specie. |         |                     |         |               |         |               |         |           |           |           |         |           |         |           |         |         |  |
|-------------------------------------------------------------------------------------|---------|---------------------|---------|---------------|---------|---------------|---------|-----------|-----------|-----------|---------|-----------|---------|-----------|---------|---------|--|
| All H-Inv proteins                                                                  | 52.4    | H-Inv I-IV proteins | 52.3    | Budding yeast | 39.6    | Fission yeast | 39.6    | Worm      | 42.8      | Bacteria  | 51.8    | Plant     | 44.1    | Fly       | 53.8    |         |  |
| frequency                                                                           | %       | frequency           | %       | frequency     | %       | frequency     | %       | frequency | %         | frequency | %       | frequency | %       | frequency | %       |         |  |
| ttt                                                                                 | 252,900 | 1.37891             | 319,595 | 1.49287       | 254,287 | 2.83314       | 246,228 | 3.50041   | 690,695   | 2.46172   | 75,058  | 1.83909   | 754,094 | 2.18091   | 323,198 | 1.14554 |  |
| ttc                                                                                 | 279,754 | 1.52533             | 333,100 | 1.55595       | 162,147 | 1.93923       | 162,147 | 2.30510   | 668,555   | 2.38281   | 58,440  | 1.43191   | 742,906 | 2.14855   | 424,079 | 1.50310 |  |
| tta                                                                                 | 146,954 | 0.80125             | 176,396 | 0.82397       | 180,840 | 2.01483       | 160,242 | 2.27802   | 330,589   | 1.17826   | 61,634  | 1.51017   | 480,724 | 1.39030   | 191,909 | 0.68020 |  |
| tgc                                                                                 | 248,998 | 1.35762             | 293,214 | 1.36964       | 190,564 | 2.12317       | 174,973 | 2.48744   | 615,918   | 2.19520   | 68,800  | 1.68575   | 810,654 | 2.34448   | 368,023 | 1.30441 |  |
| ctt                                                                                 | 279,975 | 1.52653             | 333,128 | 1.55608       | 146,060 | 1.62733       | 159,093 | 2.26168   | 440,100   | 1.56857   | 44,422  | 1.08844   | 721,202 | 2.08578   | 338,327 | 1.19916 |  |
| ctc                                                                                 | 320,451 | 1.74722             | 389,334 | 1.81862       | 146,060 | 1.62733       | 93,003  | 1.32214   | 420,827   | 1.49988   | 37,300  | 0.91393   | 591,562 | 1.71085   | 394,391 | 1.39787 |  |
| cta                                                                                 | 165,400 | 0.90183             | 192,448 | 0.89895       | 125,575 | 1.39910       | 94,847  | 1.34836   | 261,329   | 0.93141   | 27,833  | 0.68197   | 398,669 | 1.15299   | 266,856 | 0.94584 |  |
| ctg                                                                                 | 516,409 | 2.81566             | 601,124 | 2.80792       | 117,220 | 1.30601       | 99,257  | 1.41105   | 407,190   | 1.45127   | 113,319 | 2.77657   | 518,425 | 1.49933   | 610,805 | 2.16492 |  |
| att                                                                                 | 216,682 | 1.18143             | 256,804 | 1.19956       | 250,265 | 2.78833       | 202,408 | 2.87746   | 730,683   | 2.60424   | 74,581  | 1.82740   | 634,968 | 1.83638   | 347,647 | 1.23219 |  |
| ata                                                                                 | 242,361 | 1.32145             | 279,011 | 1.30329       | 154,714 | 1.72375       | 118,201 | 1.68036   | 565,319   | 2.01486   | 69,666  | 1.70697   | 619,584 | 1.79189   | 524,688 | 1.85969 |  |
| aca                                                                                 | 146,936 | 0.80115             | 172,576 | 0.80612       | 182,395 | 2.03216       | 117,786 | 1.67446   | 371,272   | 1.32326   | 40,028  | 0.98078   | 438,863 | 1.26923   | 246,268 | 0.87287 |  |
| atg                                                                                 | 340,663 | 1.85743             | 391,498 | 1.82873       | 188,228 | 2.09715       | 152,483 | 2.16772   | 638,611   | 2.27608   | 79,746  | 1.95396   | 779,807 | 2.25527   | 498,988 | 1.76860 |  |
| gtt                                                                                 | 178,746 | 0.97459             | 212,280 | 0.99158       | 149,777 | 1.66874       | 135,861 | 1.93142   | 444,283   | 1.58348   | 69,741  | 1.70881   | 678,115 | 1.96117   | 299,365 | 1.06106 |  |
| gtc                                                                                 | 199,746 | 1.08909             | 235,634 | 1.10067       | 83,712  | 0.93268       | 73,300  | 1.04204   | 314,935   | 1.12247   | 48,804  | 1.19581   | 394,085 | 1.13973   | 351,592 | 1.24617 |  |
| gta                                                                                 | 121,917 | 0.66474             | 143,021 | 0.66807       | 103,579 | 1.15403       | 79,782  | 1.13419   | 229,535   | 0.81809   | 44,195  | 1.08288   | 325,055 | 0.94009   | 188,112 | 0.66674 |  |
| gtg                                                                                 | 334,510 | 1.82388             | 387,873 | 1.81118       | 95,023  | 1.05870       | 73,678  | 1.04742   | 355,515   | 1.26710   | 70,408  | 1.72515   | 502,996 | 1.45459   | 475,590 | 1.68567 |  |
| tgt                                                                                 | 283,547 | 1.54655             | 343,475 | 1.60441       | 140,325 | 1.55343       | 133,465 | 1.89735   | 488,462   | 1.74094   | 51,552  | 1.26314   | 768,134 | 2.22151   | 349,698 | 1.23946 |  |
| tcc                                                                                 | 320,039 | 1.74498             | 382,918 | 1.78866       | 112,584 | 1.25436       | 98,405  | 1.39894   | 394,070   | 1.40451   | 42,500  | 1.04135   | 486,742 | 1.40770   | 476,928 | 1.69041 |  |
| tca                                                                                 | 326,069 | 1.77786             | 383,194 | 1.78994       | 177,855 | 1.98158       | 134,779 | 1.91603   | 668,610   | 2.38300   | 58,898  | 1.44289   | 722,915 | 2.09074   | 442,826 | 1.56954 |  |
| tcg                                                                                 | 112,756 | 0.61479             | 127,744 | 0.59671       | 74,946  | 0.83501       | 80,000  | 1.13729   | 418,493   | 1.49156   | 61,270  | 1.50125   | 700,345 | 1.97107   | 423,860 | 1.50232 |  |
| ctt                                                                                 | 394,194 | 2.1493              | 467,812 | 2.1852        | 91,838  | 1.02321       | 89,830  | 1.27703   | 216,203   | 0.77057   | 44,044  | 1.07918   | 399,422 | 1.15516   | 393,861 | 1.39599 |  |
| ccc                                                                                 | 379,519 | 2.06929             | 451,139 | 2.10732       | 61,171  | 0.68154       | 50,367  | 0.71602   | 165,833   | 0.59105   | 34,098  | 0.83548   | 200,487 | 0.57983   | 369,717 | 1.31042 |  |
| cca                                                                                 | 437,419 | 2.38498             | 513,546 | 2.39883       | 148,100 | 1.65006       | 88,427  | 1.25709   | 466,527   | 1.66276   | 54,372  | 1.33224   | 474,036 | 1.37095   | 688,949 | 2.44190 |  |
| cog                                                                                 | 194,944 | 1.06291             | 223,062 | 1.04195       | 55,015  | 0.61295       | 47,118  | 0.66983   | 272,227   | 0.97025   | 82,049  | 2.01038   | 277,914 | 0.80375   | 470,445 | 1.66743 |  |
| act                                                                                 | 244,657 | 1.33397             | 286,604 | 1.33876       | 143,608 | 1.60001       | 112,219 | 1.59532   | 435,211   | 1.55114   | 46,731  | 1.14501   | 491,521 | 1.42152   | 366,726 | 1.29982 |  |
| acc                                                                                 | 305,753 | 1.66708             | 353,337 | 1.65048       | 108,227 | 1.20581       | 72,513  | 1.03085   | 297,857   | 1.06160   | 62,735  | 1.53715   | 387,048 | 1.11938   | 443,846 | 1.57316 |  |
| aca                                                                                 | 328,721 | 1.79232             | 383,382 | 1.79082       | 179,555 | 2.00052       | 110,817 | 1.57539   | 532,090   | 1.89643   | 47,993  | 1.17594   | 593,575 | 1.71667   | 484,815 | 1.71837 |  |
| acg                                                                                 | 126,996 | 0.69243             | 143,226 | 0.66903       | 90,539  | 1.00874       | 63,970  | 0.90940   | 319,547   | 1.13890   | 63,839  | 1.56420   | 307,842 | 0.89031   | 417,996 | 1.48154 |  |
| gct                                                                                 | 359,425 | 1.95973             | 417,726 | 1.95125       | 106,925 | 1.19131       | 110,686 | 1.57353   | 389,570   | 1.38847   | 80,546  | 1.97356   | 570,781 | 1.65075   | 500,744 | 1.77483 |  |
| gcc                                                                                 | 400,463 | 2.18348             | 467,782 | 2.18506       | 74,308  | 0.82790       | 54,457  | 0.77417   | 263,030   | 0.93747   | 75,230  | 1.84330   | 277,581 | 0.80279   | 633,567 | 2.24560 |  |
| gca                                                                                 | 356,479 | 1.94366             | 413,668 | 1.93229       | 117,085 | 1.30450       | 88,463  | 1.25760   | 392,083   | 1.39743   | 84,489  | 2.07017   | 462,267 | 1.33692   | 669,420 | 2.37268 |  |
| gcg                                                                                 | 166,912 | 0.91007             | 190,130 | 0.88812       | 47,255  | 0.52649       | 40,925  | 0.58179   | 181,443   | 0.64668   | 111,848 | 2.74053   | 220,429 | 0.63750   | 488,760 | 1.73235 |  |
| tat                                                                                 | 163,975 | 0.89406             | 193,190 | 0.90241       | 187,637 | 2.09056       | 152,398 | 2.16651   | 450,088   | 1.60388   | 62,158  | 1.52301   | 494,645 | 1.43056   | 253,391 | 0.89811 |  |
| tac                                                                                 | 177,850 | 0.96971             | 204,551 | 0.95548       | 137,773 | 1.53500       | 108,141 | 1.53735   | 310,641   | 1.10716   | 47,464  | 1.16297   | 390,845 | 1.13036   | 307,843 | 1.09111 |  |
| taa                                                                                 | 138,410 | 0.75467             | 164,195 | 0.76697       | 171,311 | 1.90866       | 123,267 | 1.75238   | 283,959   | 1.01206   | 47,914  | 1.17400   | 426,845 | 1.23447   | 206,604 | 0.73228 |  |
| tag                                                                                 | 101,057 | 0.551               | 122,601 | 0.57268       | 95,046  | 1.05896       | 68,851  | 0.97879   | 148,119   | 0.52791   | 16,154  | 0.39581   | 330,977 | 0.95722   | 124,657 | 0.44183 |  |
| cat                                                                                 | 280,215 | 1.52784             | 325,791 | 1.52181       | 148,190 | 1.65106       | 111,500 | 1.58510   | 460,242   | 1.64036   | 54,530  | 1.33611   | 536,614 | 1.55194   | 450,100 | 1.59532 |  |
| cac                                                                                 | 299,047 | 1.63052             | 355,533 | 1.66074       | 100,098 | 1.11524       | 61,473  | 0.87391   | 382,479   | 1.36320   | 49,452  | 1.21168   | 384,347 | 1.11157   | 492,562 | 1.74583 |  |
| caa                                                                                 | 343,848 | 1.87479             | 397,142 | 1.8551        | 247,428 | 2.75672       | 168,646 | 2.39749   | 801,827   | 2.85780   | 65,016  | 1.59304   | 806,214 | 2.33164   | 682,554 | 2.41923 |  |
| cag                                                                                 | 526,027 | 2.8681              | 615,909 | 2.87698       | 126,510 | 1.40951       | 80,867  | 1.14961   | 414,760   | 1.47825   | 76,744  | 1.88040   | 525,618 | 1.52013   | 660,032 | 2.33940 |  |
| aat                                                                                 | 233,534 | 1.27332             | 272,064 | 1.27084       | 254,783 | 2.83867       | 187,873 | 2.67082   | 758,451   | 2.70321   | 60,156  | 1.47396   | 626,032 | 1.81054   | 394,100 | 1.39684 |  |
| aac                                                                                 | 249,657 | 1.36123             | 287,506 | 1.34297       | 179,034 | 1.99471       | 120,925 | 1.71908   | 533,534   | 1.90158   | 75,172  | 1.84188   | 589,386 | 1.70456   | 481,225 | 1.70564 |  |
| aaa                                                                                 | 395,987 | 2.15908             | 464,032 | 2.16755       | 372,463 | 4.14980       | 275,759 | 3.92022   | 1,019,223 | 3.63263   | 102,910 | 2.52153   | 906,492 | 2.62166   | 479,384 | 1.69912 |  |
| gat                                                                                 | 428,835 | 2.33818             | 490,034 | 2.28901       | 244,694 | 2.72626       | 166,182 | 2.36246   | 657,942   | 2.34498   | 63,756  | 1.56217   | 968,132 | 2.79992   | 560,029 | 1.98495 |  |
| gaa                                                                                 | 261,154 | 1.42391             | 296,924 | 1.38697       | 179,306 | 1.99774       | 134,170 | 1.90738   | 616,059   | 2.19571   | 83,632  | 2.04917   | 788,652 | 2.28085   | 503,782 | 1.78559 |  |
| gac                                                                                 | 279,912 | 1.52292             | 318,632 | 1.49837       | 105,530 | 1.17576       | 68,980  | 0.98063   | 358,051   | 1.27614   | 49,210  | 1.20576   | 415,408 | 1.20140   | 433,758 | 1.53740 |  |
| gaa                                                                                 | 433,140 | 2.36165             | 493,058 | 2.30313       | 260,793 | 2.90563       | 185,963 | 2.64367   | 874,491   | 3.11679   | 88,860  | 2.17727   | 960,223 | 2.77705   | 547,797 | 1.94160 |  |
| gag                                                                                 | 431,410 | 2.35222             | 496,848 | 2.32084       | 122,939 | 1.44980       | 84,743  | 1.20472   | 475,371   | 1.69428   | 35,533  | 0.87064   | 758,843 | 2.19464   | 590,803 | 2.09403 |  |
| tgt                                                                                 | 272,240 | 1.48436             | 322,914 | 1.50837       | 123,309 | 1.37385       | 111,779 | 1.58906   | 448,962   | 1.60015   | 51,018  | 1.25006   | 587,261 | 1.69841   | 323,338 | 1.14603 |  |
| tgc                                                                                 | 351,712 | 1.91767             | 410,929 | 1.9195        | 112,607 | 1.25461       | 107,695 | 1.53100   | 419,823   | 1.49630   | 88,599  | 2.17087   | 483,465 | 1.39822   | 581,787 | 2.06207 |  |
| tga                                                                                 | 365,365 | 1.99211             | 416,281 | 1.9445        | 201,979 | 2.25035       | 155,824 | 2.21521   | 621,065   | 2.21355   | 88,021  | 2.15671   | 802,551 | 2.32105   | 408,902 | 1.44930 |  |
| tgg                                                                                 | 451,416 | 2.4613              | 523,801 | 2.44674       | 152,733 | 1.70168       | 125,093 | 1.77834   | 527,384   | 1.87966   | 104,635 | 2.56379   | 738,564 | 2.13599   | 638,004 | 2.26133 |  |
| cgt                                                                                 | 104,255 | 0.56844             | 118,973 | 0.55574       | 67,824  | 0.75566       | 71,705  | 1.01937   | 277,201   | 0.98798   | 69,128  | 1.69379   | 288,716 | 0.83499   | 291,393 | 1.03281 |  |
| cgc                                                                                 | 164,371 | 0.89621             | 188,497 | 0.88049       | 50,585  | 0.56359       | 42,046  | 0.5977    |           |           |         |           |         |           |         |         |  |
