# Supplementary material for: Integrative Annotation of 21,037 Human Genes Validated by Full-Length cDNA Clones
Source: PLoS Biol. 2004 Apr 20;2(6):e162. doi: 10.1371/journal.pbio.0020162 (PMC393292; doi:10.1371/journal.pbio.0020162)
Supplement: Table S6 — All these 32 H-Inv proteins were newly assigned enzyme numbers with the support of the KEGG pathway. These enzyme assignments were previously unrepresented in Homo sapiens. (33 KB PDF). [file pbio.0020162.st006.pdf]

**Table S6.**  
**List of Newly Assigned Human Enzymes (32 H-Inv Proteins)**

All these 32 H-Inv proteins were newly assigned enzyme numbers with the support of the KEGG pathway. These enzyme assignments were previously unrepresented in *Homo sapiens*.

| H-Inv ID                     | H-Inv cluster ID | Acc No.  | EC num       | KEGG pathway ID       | KEGG pathway title                         |
|------------------------------|------------------|----------|--------------|-----------------------|--------------------------------------------|
| <a href="#">HIT000038588</a> | HIX0001987       | BC019263 | EC 5.1.3.3   | <a href="#">00010</a> | Glycolysis / Gluconeogenesis               |
| <a href="#">HIT000037168</a> | HIX0002249       | BC015529 | EC 5.3.1.6   | <a href="#">00030</a> | Pentose phosphate pathway                  |
| <a href="#">HIT000000067</a> | HIX0019361       | AB002359 | EC 6.3.5.3   | <a href="#">00230</a> | Purine metabolism                          |
| <a href="#">HIT000004430</a> | HIX0008425       | AK001956 | EC 4.2.1.70  | <a href="#">00240</a> | Pyrimidine metabolism                      |
| <a href="#">HIT000012968</a> | HIX0016881       | AK056354 | EC 2.4.2.9   | <a href="#">00240</a> | Pyrimidine metabolism                      |
| <a href="#">HIT000018796</a> | HIX0009231       | BC030601 | EC 4.2.1.70  | <a href="#">00240</a> | Pyrimidine metabolism                      |
| <a href="#">HIT000034411</a> | HIX0022535       | BC009505 | EC 4.2.1.70  | <a href="#">00240</a> | Pyrimidine metabolism                      |
| <a href="#">HIT000005710</a> | HIX0009900       | AK022436 | EC 6.3.5.1   | <a href="#">00251</a> | Glutamate metabolism                       |
| <a href="#">HIT000016761</a> | HIX0009707       | AK091894 | EC 3.5.1.1   | <a href="#">00252</a> | Alanine and aspartate metabolism           |
| <a href="#">HIT000014369</a> | HIX0007313       | AK057762 | EC 1.1.1.103 | <a href="#">00260</a> | Glycine, serine and threonine metabolism   |
| <a href="#">HIT000041904</a> | HIX0022766       | BC033687 | EC 2.1.2.9   | <a href="#">00271</a> | Methionine metabolism                      |
| <a href="#">HIT000008832</a> | HIX0006550       | AK025558 | EC 1.1.1.31  | <a href="#">00280</a> | Valine, leucine and isoleucine degradation |
| <a href="#">HIT000004166</a> | HIX0014523       | AK001692 | EC 3.5.1.18  | <a href="#">00300</a> | Lysine biosynthesis                        |
| <a href="#">HIT000012380</a> | HIX0021688       | AK055766 | EC 3.5.1.4   | <a href="#">00330</a> | Arginine and proline metabolism            |
| <a href="#">HIT000011231</a> | HIX0010901       | AK054617 | EC 3.5.2.7   | <a href="#">00340</a> | Histidine metabolism                       |
| <a href="#">HIT000012476</a> | HIX0022393       | AK055862 | EC 4.2.1.49  | <a href="#">00340</a> | Histidine metabolism                       |
| <a href="#">HIT000004593</a> | HIX0002961       | AK002119 | EC 4.4.1.16  | <a href="#">00450</a> | Selenoamino acid metabolism                |
| <a href="#">HIT000024385</a> | HIX0022242       | AL096750 | EC 3.5.2.9   | <a href="#">00480</a> | Glutathione metabolism                     |
| <a href="#">HIT000020773</a> | HIX0020869       | AK095918 | EC 3.2.1.4   | <a href="#">00500</a> | Starch and sucrose metabolism              |
| <a href="#">HIT000023644</a> | HIX0000875       | AK098814 | EC 3.2.1.14  | <a href="#">00530</a> | Aminosugars metabolism                     |
| <a href="#">HIT000029276</a> | HIX0008220       | BC000008 | EC 4.1.3.19  | <a href="#">00530</a> | Aminosugars metabolism                     |
| <a href="#">HIT000003634</a> | HIX0010434       | AK001160 | EC 3.2.1.14  | <a href="#">00530</a> | Aminosugars metabolism                     |
| <a href="#">HIT000007189</a> | HIX0009686       |          | E2.7.2.2914  | <a href="#">_____</a> |                                            |

|                              |            |          |              |                       |                       |
|------------------------------|------------|----------|--------------|-----------------------|-----------------------|
| <a href="#">HIT000014259</a> | HIX0009576 | AK057649 | EC 4.4.1.14  | <a href="#">00640</a> | Propanoate metabolism |
| <a href="#">HIT000015047</a> | HIX0023118 | AK074267 | EC 6.2.1.17  | <a href="#">00640</a> | Propanoate metabolism |
| <a href="#">HIT000004284</a> | HIX0000590 | AK001810 | EC 4.2.1.55  | <a href="#">00650</a> | Butanoate metabolism  |
| <a href="#">HIT000008034</a> | HIX0022598 | AK024760 | EC 6.2.1.16  | <a href="#">00650</a> | Butanoate metabolism  |
| <a href="#">HIT000013606</a> | HIX0022188 | AK056992 | EC 1.1.1.244 | <a href="#">00680</a> | Methane metabolism    |
| <a href="#">HIT000016603</a> | HIX0007177 | AK091736 | EC 2.7.6.2   | <a href="#">00730</a> | Thiamine metabolism   |
| <a href="#">HIT000003871</a> | HIX0013930 | AK001397 | EC 1.4.3.5   | <a href="#">00750</a> | Vitamin B6 metabolism |

---
