# Supplementary material for: Integrative Annotation of 21,037 Human Genes Validated by Full-Length cDNA Clones
Source: PLoS Biol. 2004 Apr 20;2(6):e162. doi: 10.1371/journal.pbio.0020162 (PMC393292; doi:10.1371/journal.pbio.0020162)
Supplement: Table S7 — (See also Figure 6.) (9 KB PDF). [file pbio.0020162.st007.pdf]

**Table S7.****A Functional Classification of Representative H-Inv cDNAs That Have Homologs in Other Species**

| Function                  | Mammal | Animal <sup>*</sup> | Fungus | Plant | Eukaryote <sup>†</sup> | Prokaryote |
|---------------------------|--------|---------------------|--------|-------|------------------------|------------|
| Ligand binding or carrier | 3142   | 2917                | 1622   | 1732  | 1462                   | 715        |
| Enzyme                    | 2361   | 2298                | 1665   | 1719  | 1468                   | 1241       |
| Transporter               | 635    | 597                 | 319    | 359   | 273                    | 243        |
| Signal transducer         | 525    | 471                 | 63     | 61    | 86                     | 31         |
| Transcription regulator   | 325    | 291                 | 59     | 55    | 35                     | 10         |
| Structural molecule       | 256    | 262                 | 190    | 200   | 182                    | 117        |
| Enzyme regulator          | 91     | 79                  | 20     | 40    | 24                     | 26         |
| Motor                     | 75     | 75                  | 63     | 64    | 62                     | 14         |
| Translation regulator     | 54     | 53                  | 46     | 49    | 36                     | 34         |
| Apoptosis regulator       | 46     | 27                  | 3      | 5     | 3                      | 2          |
| Cell adhesion molecule    | 25     | 24                  | 5      | 1     | 5                      | 6          |
| Chaperone                 | 17     | 17                  | 14     | 16    | 13                     | 14         |
| Others                    | 106    | 100                 | 52     | 71    | 35                     | 35         |

\* Non-mammalian animals.

† Eukaryotes other than animals, fungi, and plants.

(See also Figure 6.)
