# Supplementary material for: Integrative Annotation of 21,037 Human Genes Validated by Full-Length cDNA Clones
Source: PLoS Biol. 2004 Apr 20;2(6):e162. doi: 10.1371/journal.pbio.0020162 (PMC393292; doi:10.1371/journal.pbio.0020162)
Supplement: Table S9 — One hundred and forty-seven UTR replacements distributed among different species were detected. (9 KB PDF). [file pbio.0020162.st009.pdf]

**Table S9. UTR Replacements in Primates and Rodents**

One hundred and forty-nine UTR replacements distributed among different species were detected.

|                          | 5' UTRs                               |                                    | 3' UTRs                               |                                    |
|--------------------------|---------------------------------------|------------------------------------|---------------------------------------|------------------------------------|
|                          | Number of<br>observed<br>replacements | Number of<br>sequences<br>analyzed | Number of<br>observed<br>replacements | Number of<br>sequences<br>analyzed |
| <i>Homo sapiens</i>      | 14                                    | 977                                | 9                                     | 1,725                              |
| <i>Pan troglodytes</i>   | 2                                     | 195                                | 14                                    | 95                                 |
| <i>Macaca</i>            | 10                                    | 158                                | 3                                     | 402                                |
| <i>Macaca mulatta</i>    |                                       |                                    | 3                                     | 53                                 |
| <i>Mus musculus</i>      | 25                                    | 987                                | 29                                    | 1,713                              |
| <i>Rattus norvegicus</i> | 21                                    | 744                                | 19                                    | 1,289                              |
| Total                    | 72                                    | 3,061                              | 77                                    | 5,277                              |
